# Supplementary material for: Natural Deep Eutectic Solvents for the Extraction of Triterpene Saponins from Aralia elata var. mandshurica (Rupr. & Maxim.) J. Wen
Source: MDPI journal article supplement (doi:10.3390/molecules28083614), 2023-04-21
Supplement: s1 [file s1]

**Natural deep eutectic solvents for the extraction of triterpenoid saponins from *Aralia elata* var. *mandshurica* (Rupr. & Maxim.) J. Wen**

Alyona A. Petrochenko<sup>1‡</sup>, Anastasia Orlova<sup>‡2</sup>, Nadezhda Frolova<sup>3</sup>, Evgeny B. Serebryakov<sup>4</sup>, Alena Soboleva<sup>2</sup>, Elena V. Flisyuk<sup>1</sup>, Andrej Frolov<sup>2\*</sup> and Alexander N. Shikov<sup>1\*</sup>

**Supplementary Information S1**

<sup>1</sup>Department of Technology of Pharmaceutical Formulations, St. Petersburg State Chemical Pharmaceutical University, 197376 Saint-Petersburg, Russia, <sup>2</sup>K.A. Timiryazev Institute of Plant Physiology RAS, 127276 Moscow, Russia, <sup>3</sup>Department of Plant Physiology and Biochemistry, St. Petersburg State University, 199034 Saint-Petersburg, Russia, <sup>4</sup>Chemical Analysis and Materials Research Centre, St. Petersburg State University, 198504 Saint-Petersburg, Russia

<sup>‡</sup>These authors contribute equally to the manuscript

\*Corresponding authors:

Dr. Andrej Frolov

K.A. Timiryazev Institute of Plant Physiology  
RAS

Laboratory of analytical biochemistry and  
biotechnology

Moscow, Russia

Tel. +7 499 678-54-00

Email: frolov@ifr.moscow

Prof. Alexander N. Shikov

St. Petersburg State Chemical Pharmaceutical  
University

Department of Technology of Pharmaceutical  
Formulations

Saint-Petersburg, Russia

Tel. +7 911 701-01-06

Email: alexs79@mail.ru

## Directory

|                                                                                                                                                                                                                                                                                                                                                                                                                                                                                                                                                                                                                     |    |
|---------------------------------------------------------------------------------------------------------------------------------------------------------------------------------------------------------------------------------------------------------------------------------------------------------------------------------------------------------------------------------------------------------------------------------------------------------------------------------------------------------------------------------------------------------------------------------------------------------------------|----|
| <b>Table S1</b> The list of triterpene saponins predicted in different parts of <i>Aralia elata</i> var. <i>mandshurica</i> (Rupr. & Maxim.) J. Wen based on literature mining .....                                                                                                                                                                                                                                                                                                                                                                                                                                | 5  |
| <b>Table S2</b> Triterpene saponins annotated in the extracts of <i>Aralia elata</i> var. <i>mandshurica</i> (Rupr. & Maxim.) J. Wen roots by reversed ultra phase high performance liquid chromatography-mass spectrometry (RP-UHPLC-QqTOF-MS) in untargeted SWATH experiments (with the inclusion list containing the $m/z$ of all predicted $[M-H]^-$ ions using published data).....                                                                                                                                                                                                                            | 9  |
| <b>Table S3</b> List of compounds confirmed by MS <sup>2</sup> analysis in the roots of <i>Aralia elata</i> var. <i>mandshurica</i> (Rupr. & Maxim.) J. Wen .....                                                                                                                                                                                                                                                                                                                                                                                                                                                   | 11 |
| <b>Table S4</b> Triterpene saponins annotated in the extracts of <i>Aralia elata</i> var. <i>mandshurica</i> (Rupr. & Maxim.) J. Wen roots by reversed phase ultra-high performance liquid chromatography-mass spectrometry and tandem mass spectrometry (RP-UHPLC-QqTOF-MS and MS/MS) in SWATH and data-dependent acquisition (DDA) experiments .....                                                                                                                                                                                                                                                              | 12 |
| <b>Table S5</b> The conditions of reverse phase-ultra high performance liquid chromatographic (RP-UHPLC) separation and the settings for electrospray ionization-quadrupole-time of flight mass spectrometry (ESI-QqTOF-MS) applied for the profiling (untargeted analysis) of <i>Aralia elata</i> var. <i>mandshurica</i> (Rupr. & Maxim.) J. Wen root semi-polar secondary metabolites with QqTOF hybriide mass spectrometer SHIMADZU LCMS-9030 System (SHIMADZU Corporation, Kyoto, Japan). ...                                                                                                                  | 14 |
| <b>Table S6</b> The conditions of reversed phase-ultrahigh performance liquid chromatographic (RP-UHPLC) separation and the settings for electrospray ionization-quadrupole-time of flight mass spectrometry (ESI-QqTOF-MS) applied for the SWATH and DDA MS/MS analysis of <i>Aralia elata</i> var. <i>mandshurica</i> (Rupr. & Maxim.) J. Wen root semi-polar secondary metabolites with Waters ACQUITY UPLC I-Class UPLC System (Waters GmbH, Eschborn, Germany) coupled online to a hybrid quadrupole-time of flight mass spectrometer (QqTOF-MS) AB Sciex TripleTOF 6600 (AB Sciex, Darmstadt, Germany). ..... | 17 |
| <b>Figures S1–S14</b> Chromatographic and mass spectral data of triterpene saponins annotated in the extracts of <i>Aralia elata</i> var. <i>mandshurica</i> (Rupr. & Maxim.) J. Wen roots by reversed phase ultra-high performance liquid chromatography-mass spectrometry and tandem mass spectrometry (RP-UHPLC-QqTOF-MS and MS/MS) in SWATH and data-dependent acquisition (DDA) experiments .....                                                                                                                                                                                                              | 21 |
| <b>Figure S1.</b> Extracted ion chromatogram (XIC) of $m/z$ $911.5000 \pm 0.02$ (A), the MS spectra (B) and MS/MS fragmentation patterns (C) of the compounds 1, 15, 20 annotated in the total ethanolic extract of <i>Aralia elata</i> var. <i>mandshurica</i> (Rupr. & Maxim.) J. Wen roots as guaiacin B isomers at $t_R$ 7.77, 10.98 and 11.01, respectively.....                                                                                                                                                                                                                                               | 23 |

|                                                                                                                                                                                                                                                                                                                                                                                                                                                                                                                                                                                                                                                                                                                                                                                                                                                      |    |
|------------------------------------------------------------------------------------------------------------------------------------------------------------------------------------------------------------------------------------------------------------------------------------------------------------------------------------------------------------------------------------------------------------------------------------------------------------------------------------------------------------------------------------------------------------------------------------------------------------------------------------------------------------------------------------------------------------------------------------------------------------------------------------------------------------------------------------------------------|----|
| <b>Figure S2.</b> Extracted ion chromatogram $m/z$ 1235.6100 $\pm$ 0.02 (A), the MS spectra (B) and MS/MS fragmentation patterns (C) of the compounds 2 annotated in the total ethanolic extract of <i>Aralia elata</i> var. <i>mandshurica</i> (Rupr. & Maxim.) J. Wen roots as oleanolic acid-3- <i>O</i> -(triglucopyranosyl-1-3-arabinopyranosyl)-28-1-glucopyranosyl. ....                                                                                                                                                                                                                                                                                                                                                                                                                                                                      | 25 |
| <b>Figure S3.</b> Extracted ion chromatogram $m/z$ 1087.5400 $\pm$ 0.02 (A), the MS spectra (B) and MS/MS fragmentation patterns (C) of the compounds 3, 6 annotated in the total ethanolic extract of <i>Aralia elata</i> var. <i>mandshurica</i> (Rupr. & Maxim.) J. Wen roots as kalopanax-saponin F isomers at $t_R$ 7.89 and 8.41, respectively.....                                                                                                                                                                                                                                                                                                                                                                                                                                                                                            | 28 |
| <b>Figure S4.</b> Extracted ion chromatogram $m/z$ 1117.5400 $\pm$ 0.02 (A), the MS spectra (B) and MS/MS fragmentation patterns (C) of the compounds 4 annotated in the total ethanolic extract of <i>Aralia elata</i> var. <i>mandshurica</i> (Rupr. & Maxim.) J. Wen roots as calendulaglycoside A. ....                                                                                                                                                                                                                                                                                                                                                                                                                                                                                                                                          | 30 |
| <b>Figure S5.</b> Extracted ion chromatogram $m/z$ 1249.5900 $\pm$ 0.02 (A), the MS spectra (B) and MS/MS fragmentation patterns (C) of the compounds 5 annotated in the total ethanolic extract of <i>Aralia elata</i> var. <i>mandshurica</i> (Rupr. & Maxim.) J. Wen roots as araliaarmoside. ....                                                                                                                                                                                                                                                                                                                                                                                                                                                                                                                                                | 32 |
| <b>Figure S6.</b> Extracted ion chromatogram $m/z$ 955.4900 $\pm$ 0.02 (A), the MS spectra (B) and MS/MS fragmentation patterns (C) of the compounds 7, 13 annotated in the total ethanolic extract of <i>Aralia elata</i> var. <i>mandshurica</i> (Rupr. & Maxim.) J. Wen roots as calendulaglycoside C isomers at $t_R$ 8.59 and 10.07, respectively.....                                                                                                                                                                                                                                                                                                                                                                                                                                                                                          | 35 |
| <b>Figure S7.</b> Extracted ion chromatogram $m/z$ 1073.5600 $\pm$ 0.02 (A), the MS spectra (B) and MS/MS fragmentation patterns (C) of the compounds 8 annotated in the total ethanolic extract of <i>Aralia elata</i> var. <i>mandshurica</i> (Rupr. & Maxim.) J. Wen roots as oleanolic acid-3- <i>O</i> -(diglucopyranosyl-1-3-arabinopyranosyl)-28-1-glucopyranosyl ester. ....                                                                                                                                                                                                                                                                                                                                                                                                                                                                 | 37 |
| <b>Figure S8.</b> Extracted ion chromatogram $m/z$ 1119.5600 $\pm$ 0.02 (A), the MS spectra (B) and MS/MS fragmentation patterns (C) of the compounds 9 annotated in the total ethanolic extract of <i>Aralia elata</i> var. <i>mandshurica</i> (Rupr. & Maxim.) J. Wen roots as oleanolic acid-3- <i>O</i> -(methyldioxy-trihexopyranosyl-1-3-pentopyranosyl)-28-1-hexopyranosyl ester.....                                                                                                                                                                                                                                                                                                                                                                                                                                                         | 39 |
| <b>Figure S9.</b> Extracted ion chromatogram $m/z$ 1057.5300 $\pm$ 0.02 (A), the MS spectra (B) and MS/MS fragmentation patterns (C) of the compounds 10 annotated in the total ethanolic extract of <i>Aralia elata</i> var. <i>mandshurica</i> (Rupr. & Maxim.) J. Wen roots as araloside B.....                                                                                                                                                                                                                                                                                                                                                                                                                                                                                                                                                   | 41 |
| <b>Figures S10.</b> Extracted ion chromatogram $m/z$ 1089.5500 $\pm$ 0.02 (A), the MS spectra (B) and MS/MS fragmentation patterns (C) of the compounds 11 annotated in the total ethanolic extract of <i>Aralia elata</i> var. <i>mandshurica</i> (Rupr. & Maxim.) J. Wen roots as araliasaponin III.....                                                                                                                                                                                                                                                                                                                                                                                                                                                                                                                                           | 43 |
| <b>Figure S11.</b> Extracted ion chromatogram $m/z$ 793.4400 $\pm$ 0.02 (A), the MS spectra (B) and MS/MS fragmentation patterns (C) of the compounds 12, 18 annotated in the total ethanolic extract of <i>Aralia elata</i> var. <i>mandshurica</i> (Rupr. & Maxim.) J. Wen roots as oleanolic acid-3- <i>O</i> -(hexosyl)-28-1-hexouronide ester isomers $t_R$ 9.02 and 10.84, respectively.....                                                                                                                                                                                                                                                                                                                                                                                                                                                   | 46 |
| <b>Figure S12.</b> Extracted ion chromatogram $m/z$ 925.4800 $\pm$ 0.02 (A), the MS spectra (B) and MS/MS fragmentation patterns (C) of the compounds 14, 16 annotated in the total ethanolic extract of <i>Aralia elata</i> var. <i>mandshurica</i> (Rupr. & Maxim.) J. Wen roots as araloside A isomers $t_R$ 10.266 and 10.401, respectively.....                                                                                                                                                                                                                                                                                                                                                                                                                                                                                                 | 49 |
| <b>Figure S13.</b> Extracted ion chromatogram $m/z$ 895.4500 $\pm$ 0.02 (A), the MS spectra (B) and MS/MS fragmentation patterns (C) of the compounds 17 annotated in the total ethanolic extract of <i>Aralia elata</i> var. <i>mandshurica</i> (Rupr. & Maxim.) J. Wen roots as oleanolic acid unknown derivatives. ....                                                                                                                                                                                                                                                                                                                                                                                                                                                                                                                           | 51 |
| <b>Figure S14.</b> Extracted ion chromatogram $m/z$ 763.4300 $\pm$ 0.02 (A), the MS spectra (B) and MS/MS fragmentation patterns (C) of the compounds 19 annotated in the total ethanolic extract of <i>Aralia elata</i> var. <i>mandshurica</i> (Rupr. & Maxim.) J. Wen roots as oleanolic acid 3- <i>O</i> -hexuronide-(1-3-pentafuranoside). ....                                                                                                                                                                                                                                                                                                                                                                                                                                                                                                 | 53 |
| <b>Figure S15.</b> The full $t_R$ range obtained in the chromatograms of ND1 and ND3 extracts of whole roots of <i>A. elata</i> (peak numbers correspond to compounds listed in Table 1). ....                                                                                                                                                                                                                                                                                                                                                                                                                                                                                                                                                                                                                                                       | 54 |
| <b>Figure S16.</b> Structures and relative recoveries of 14 (araloside isomer 1 (a)), 18 (oleanolic acid-3- <i>O</i> -(hexosyl)-28-1-hexouronide ester isomer 1 (b)), 13, expressed as the difference (fold) in comparison to those observed in aqueous and ethanolic extracts. Fold changes comparison with water (blue), fold changes comparison with ethanol (orange), * (for recoveries in relation to water) or ** (for recoveries in relation to ethanol) - $p \leq 0.05$ vs. control. The compounds are numbered as in Table 1. ND1 – NADES with choline chloride and malic acid (molar ratio 1:1), ND2 – NADES with the molar ratio of choline chloride and malic acid of 1:2, ND3 – NADES with the molar ratio of choline chloride and lactic acid of 1:3, ND4 - NADES with the molar ratio of choline chloride and lactic acid of 1:3+ 30% |    |

|                                                                                                    |           |
|----------------------------------------------------------------------------------------------------|-----------|
| (v/v) water, ND6 – NADES with the molar ratio of sorbitol and malic acid of 1:1 + 10% (v/v) water, |           |
| ND7 - NADES with the molar ratio of sorbitol and malic acid of 1:2+20% (v/v) water. ....           | 55        |
| <b>References.....</b>                                                                             | <b>56</b> |



## Tables

**Table S1.** The list of triterpene saponins predicted in different parts of *Aralia elata* var. *mandshurica* (Rupr. & Maxim.) J. Wen based on literature mining

| Compound Name                                                                                                                                          | Elemental composition                           | Molar mass | Theoretical $m/z$ | Ref  |
|--------------------------------------------------------------------------------------------------------------------------------------------------------|-------------------------------------------------|------------|-------------------|------|
| 7- <i>O</i> - $\alpha$ -rhamnopyranosyl-(S)-quercetin-3- <i>O</i> - $\beta$ -6-caffeoyl-glucopyranosyl-(1 $\rightarrow$ 2)- $\alpha$ -rhamnopyranoside | C <sub>42</sub> H <sub>46</sub> O <sub>23</sub> | 918.8134   | 917.8061          | [1]  |
| 7- <i>O</i> - $\alpha$ -rhamnopyranosyl-(S)-quercetin-3- <i>O</i> - $\beta$ -glucopyranosyl-(1 $\rightarrow$ 2)- $\alpha$ -rhamnopyranoside            | C <sub>33</sub> H <sub>40</sub> O <sub>20</sub> | 756.6686   | 755.6613          | [1]  |
| Acanthopanaxoside E                                                                                                                                    | C <sub>42</sub> H <sub>66</sub> O <sub>15</sub> | 810.4402   | 809.4329          | [2]  |
| Acanthoside D                                                                                                                                          | C <sub>48</sub> H <sub>78</sub> O <sub>18</sub> | 942.5188   | 941.5115          | [3]  |
| Acutoside A                                                                                                                                            | C <sub>42</sub> H <sub>68</sub> O <sub>13</sub> | 780.4660   | 779.4587          | [4]  |
| Anchusosid 2                                                                                                                                           | C <sub>48</sub> H <sub>78</sub> O <sub>18</sub> | 942.5188   | 941.5115          | [4]  |
| Aradecoside D                                                                                                                                          | C <sub>59</sub> H <sub>96</sub> O <sub>27</sub> | 1237.395   | 1236.3877         | [5]  |
| Araliasaponin I                                                                                                                                        | C <sub>47</sub> H <sub>76</sub> O <sub>18</sub> | 928.5032   | 927.4959          | [6]  |
| Araliasaponin II                                                                                                                                       | C <sub>47</sub> H <sub>76</sub> O <sub>19</sub> | 944.4981   | 943.4908          | [6]  |
| Araliasaponin III                                                                                                                                      | C <sub>53</sub> H <sub>86</sub> O <sub>23</sub> | 1090.5559  | 1089.5486         | [6]  |
| Araliasaponin IV                                                                                                                                       | C <sub>54</sub> H <sub>88</sub> O <sub>23</sub> | 1104.5716  | 1103.5643         | [6]  |
| Araliasaponin XVII                                                                                                                                     | C <sub>47</sub> H <sub>74</sub> O <sub>18</sub> | 926.4875   | 925.4802          | [7]  |
| Araliaarmoside                                                                                                                                         | C <sub>59</sub> H <sub>94</sub> O <sub>28</sub> | 1250.5932  | 1249.5859         | [8]  |
| Araliachinosides I                                                                                                                                     | C <sub>36</sub> H <sub>56</sub> O <sub>8</sub>  | 616.3975   | 615.3902          | [9]  |
| Araliasaponin IV                                                                                                                                       | C <sub>54</sub> H <sub>88</sub> O <sub>24</sub> | 1120.5666  | 1119.5593         | [10] |
| Araliasaponin IX                                                                                                                                       | C <sub>53</sub> H <sub>86</sub> O <sub>32</sub> | 1090.5560  | 1089.5487         | [6]  |
| Araliasaponin V                                                                                                                                        | C <sub>54</sub> H <sub>88</sub> O <sub>23</sub> | 1104.5716  | 1103.5643         | [6]  |
| Araliasaponin VI                                                                                                                                       | C <sub>54</sub> H <sub>88</sub> O <sub>24</sub> | 1120.5666  | 1119.5593         | [6]  |
| Araliasaponin VII                                                                                                                                      | C <sub>54</sub> H <sub>88</sub> O <sub>24</sub> | 1120.5666  | 1119.5593         | [6]  |
| Araliasaponin VIII                                                                                                                                     | C <sub>60</sub> H <sub>98</sub> O <sub>30</sub> | 1298.6143  | 1297.6070         | [6]  |
| Araloside A                                                                                                                                            | C <sub>47</sub> H <sub>74</sub> O <sub>18</sub> | 926.4875   | 925.4802          | [11] |
| Araloside A methyl ester                                                                                                                               | C <sub>48</sub> H <sub>76</sub> O <sub>18</sub> | 940.5032   | 939.4959          | [3]  |
| Araloside B                                                                                                                                            | C <sub>52</sub> H <sub>82</sub> O <sub>22</sub> | 1058.5298  | 1057.5225         | [11] |

|                                                                      |                                                 |           |           |      |
|----------------------------------------------------------------------|-------------------------------------------------|-----------|-----------|------|
| Araloside C                                                          | C <sub>53</sub> H <sub>84</sub> O <sub>23</sub> | 1088.5403 | 1087.5330 | [3]  |
| Araloside D                                                          | C <sub>46</sub> H <sub>74</sub> O <sub>16</sub> | 882.4977  | 881.4904  | [12] |
| Araloside G                                                          | C <sub>54</sub> H <sub>88</sub> O <sub>23</sub> | 1104.5716 | 1103.5643 | [3]  |
| Araloside H                                                          | C <sub>47</sub> H <sub>74</sub> O <sub>18</sub> | 926.4875  | 925.4802  | [13] |
| Araloside J                                                          | C <sub>47</sub> H <sub>74</sub> O <sub>18</sub> | 926.4875  | 925.4802  | [13] |
| Armatoside A                                                         | C <sub>47</sub> H <sub>74</sub> O <sub>18</sub> | 926.4875  | 925.4802  | [14] |
| Armatoside B                                                         | C <sub>47</sub> H <sub>74</sub> O <sub>19</sub> | 942.4824  | 941.4751  | [14] |
| Calendulaglycoside A                                                 | C <sub>54</sub> H <sub>86</sub> O <sub>24</sub> | 1118.5509 | 1117.5436 | [15] |
| Calendulaglycoside C                                                 | C <sub>48</sub> H <sub>76</sub> O <sub>19</sub> | 956.4980  | 955.4907  | [15] |
| Calenduloside B                                                      | C <sub>42</sub> H <sub>68</sub> O <sub>13</sub> | 780.4660  | 779.4587  | [16] |
| Calenduloside E                                                      | C <sub>36</sub> H <sub>56</sub> O <sub>9</sub>  | 632.3924  | 631.3851  | [16] |
| Calenduloside G                                                      | C <sub>41</sub> H <sub>64</sub> O <sub>13</sub> | 764.4347  | 763.4274  | [16] |
| Chikusetsusaponin (1)                                                | C <sub>36</sub> H <sub>58</sub> O <sub>8</sub>  | 618.4131  | 617.4058  | [3]  |
| Chikusetsusaponin IV                                                 | C <sub>47</sub> H <sub>74</sub> O <sub>18</sub> | 926.4875  | 925.4802  | [3]  |
| Chikusetsusaponin Ib                                                 | C <sub>41</sub> H <sub>64</sub> O <sub>13</sub> | 764.4347  | 763.4274  | [17] |
| Chikusetsusaponin IVa                                                | C <sub>42</sub> H <sub>66</sub> O <sub>14</sub> | 808.4609  | 807.4536  | [18] |
| Chikusetsusaponin V                                                  | C <sub>48</sub> H <sub>76</sub> O <sub>19</sub> | 956.4981  | 955.4908  | [18] |
| Collinsonidin                                                        | C <sub>41</sub> H <sub>66</sub> O <sub>13</sub> | 766.4503  | 765.4430  | [4]  |
| Congmunoside IX                                                      | C <sub>53</sub> H <sub>86</sub> O <sub>23</sub> | 1088.5403 | 1087.5330 | [19] |
| Congmunoside VIII                                                    | C <sub>60</sub> H <sub>98</sub> O <sub>30</sub> | 1298.6143 | 1297.6070 | [2]  |
| Congmunoside X                                                       | C <sub>60</sub> H <sub>98</sub> O <sub>28</sub> | 1266.6245 | 1265.6172 | [20] |
| Congmunoside XV                                                      | C <sub>54</sub> H <sub>88</sub> O <sub>24</sub> | 1120.5666 | 1119.5593 | [21] |
| Congmuyanoside A                                                     | C <sub>41</sub> H <sub>66</sub> O <sub>14</sub> | 782.4453  | 781.4380  | [4]  |
| Congmuyanoside B                                                     | C <sub>48</sub> H <sub>78</sub> O <sub>19</sub> | 958.5137  | 957.5064  | [22] |
| Congmuyanoside D                                                     | C <sub>42</sub> H <sub>68</sub> O <sub>14</sub> | 764.4609  | 763.4536  | [23] |
| Congmuyanoside E                                                     | C <sub>48</sub> H <sub>76</sub> O <sub>19</sub> | 956.4981  | 955.4908  | [4]  |
| Congmuyanoside G                                                     | C <sub>60</sub> H <sub>98</sub> O <sub>29</sub> | 1282.6193 | 1281.6120 | [4]  |
| Congmuyenoside A                                                     | C <sub>41</sub> H <sub>66</sub> O <sub>13</sub> | 766.4503  | 765.4430  | [24] |
| Congmuyenoside III                                                   | C <sub>60</sub> H <sub>98</sub> O <sub>29</sub> | 1282.6193 | 1281.6120 | [4]  |
| Congmuyenoside IV                                                    | C <sub>42</sub> H <sub>68</sub> O <sub>15</sub> | 812.4558  | 811.4485  | [23] |
| Durupcoside C                                                        | C <sub>47</sub> H <sub>76</sub> O <sub>18</sub> | 928.5032  | 927.4959  | [25] |
| Echinocystic acid-3- <i>O</i> -β- <i>D</i> -glucopyranosyl-(1-3)- β- | C <sub>46</sub> H <sub>47</sub> O <sub>15</sub> | 839.2915  | 838.2842  | [1]  |

|                                                                                                  |                                                 |           |           |      |
|--------------------------------------------------------------------------------------------------|-------------------------------------------------|-----------|-----------|------|
| <i>D</i> -glucuronopyranoside-6'- <i>O</i> -butyl ester                                          |                                                 |           |           |      |
| Eclalbasaponin I                                                                                 | C <sub>42</sub> H <sub>68</sub> O <sub>14</sub> | 764.4609  | 763.4536  | [23] |
| Eclalbasaponin III                                                                               | C <sub>48</sub> H <sub>78</sub> O <sub>19</sub> | 958.5137  | 957.5064  | [26] |
| Ecliptasaponin B                                                                                 | C <sub>41</sub> H <sub>66</sub> O <sub>14</sub> | 958.5137  | 957.5064  | [27] |
| Elatoside A                                                                                      | C <sub>47</sub> H <sub>74</sub> O <sub>18</sub> | 926.4875  | 925.4802  | [18] |
| Elatoside B                                                                                      | C <sub>48</sub> H <sub>76</sub> O <sub>19</sub> | 956.4981  | 955.4908  | [18] |
| Elatoside D                                                                                      | C <sub>54</sub> H <sub>86</sub> O <sub>24</sub> | 1118.5509 | 1117.5436 | [28] |
| Elatoside G                                                                                      | C <sub>36</sub> H <sub>56</sub> O <sub>11</sub> | 664.3824  | 663.3751  | [29] |
| Elatoside H                                                                                      | C <sub>42</sub> H <sub>66</sub> O <sub>15</sub> | 810.4402  | 809.4329  | [29] |
| Ginsenin R0                                                                                      | C <sub>48</sub> H <sub>76</sub> O <sub>19</sub> | 956.4981  | 955.4908  | [18] |
| Guaiacin B                                                                                       | C <sub>47</sub> H <sub>76</sub> O <sub>17</sub> | 912.5083  | 911.5010  | [30] |
| Hemsloside G2                                                                                    | C <sub>55</sub> H <sub>88</sub> O <sub>24</sub> | 1132.5666 | 1131.5593 | [7]  |
| Kalopanax-saponin F                                                                              | C <sub>53</sub> H <sub>84</sub> O <sub>23</sub> | 1088.5403 | 1087.5330 | [31] |
| Kalopanax-saponin F methyl ester                                                                 | C <sub>53</sub> H <sub>86</sub> O <sub>23</sub> | 1088.5403 | 1087.5330 | [31] |
| Lucynoside E                                                                                     | C <sub>42</sub> H <sub>68</sub> O <sub>14</sub> | 764.4609  | 763.4536  | [23] |
| Lucynoside H                                                                                     | C <sub>42</sub> H <sub>68</sub> O <sub>13</sub> | 780.4660  | 779.4587  | [4]  |
| Momordin Ic                                                                                      | C <sub>41</sub> H <sub>64</sub> O <sub>13</sub> | 764.4347  | 763.4274  | [32] |
| Olean-12-en-28-oic acid, 3- <i>O</i> -β-d-glucopyranosyl(1<br>→ 4)-β-d-glucopyranosyl-olean acid | C <sub>42</sub> H <sub>68</sub> O <sub>13</sub> | 780.4660  | 779.4587  | [23] |
| Pseudoginsenoside RT1                                                                            | C <sub>47</sub> H <sub>74</sub> O <sub>18</sub> | 926.4875  | 925.4802  | [33] |
| Pseudoginsenoside RT1 butyl ester                                                                | C <sub>51</sub> H <sub>82</sub> O <sub>18</sub> | 982.5501  | 981.5428  | [33] |
| Quinoasaponin 2                                                                                  | C <sub>48</sub> H <sub>78</sub> O <sub>19</sub> | 958.5137  | 957.5064  | [34] |
| Quinoasaponin B                                                                                  | C <sub>47</sub> H <sub>76</sub> O <sub>18</sub> | 928.5032  | 927.4959  | [10] |
| Randianin                                                                                        | C <sub>42</sub> H <sub>68</sub> O <sub>13</sub> | 780.4660  | 779.4587  | [4]  |
| Salsoloside C                                                                                    | C <sub>47</sub> H <sub>74</sub> O <sub>18</sub> | 926.4875  | 925.4802  | [35] |
| Silphioside A                                                                                    | C <sub>43</sub> H <sub>68</sub> O <sub>14</sub> | 808.4609  | 807.4536  | [3]  |
| Silphioside B                                                                                    | C <sub>42</sub> H <sub>68</sub> O <sub>13</sub> | 780.4660  | 779.4587  | [23] |
| Silphioside E                                                                                    | C <sub>48</sub> H <sub>78</sub> O <sub>18</sub> | 942.5188  | 941.5115  | [4]  |
| Spinasaponin A                                                                                   | C <sub>42</sub> H <sub>66</sub> O <sub>14</sub> | 808.4609  | 807.4536  | [36] |
| Spinasaponin A <sub>28</sub> - <i>O</i> -glycoside                                               | C <sub>48</sub> H <sub>76</sub> O <sub>19</sub> | 956.4981  | 955.4908  | [36] |
| Stipuleanoside R1                                                                                | C <sub>47</sub> H <sub>74</sub> O <sub>18</sub> | 926.4875  | 925.4802  | [18] |
| Stipuleanoside R2                                                                                | C <sub>53</sub> H <sub>84</sub> O <sub>23</sub> | 1088.5403 | 1087.5330 | [28] |
| Taibaienoside I                                                                                  | C <sub>51</sub> H <sub>82</sub> O <sub>18</sub> | 982.5501  | 981.5428  | [37] |

|                                |                                                 |           |           |      |
|--------------------------------|-------------------------------------------------|-----------|-----------|------|
| Taibaienoside II               | C <sub>49</sub> H <sub>78</sub> O <sub>18</sub> | 954.5188  | 953.5115  | [37] |
| Taibaienoside III              | C <sub>55</sub> H <sub>88</sub> O <sub>23</sub> | 1116.5716 | 1115.5643 | [37] |
| Taibaienoside IV               | C <sub>46</sub> H <sub>74</sub> O <sub>14</sub> | 850.5078  | 849.5005  | [37] |
| Taibaienoside V                | C <sub>52</sub> H <sub>86</sub> O <sub>14</sub> | 934.6018  | 933.5945  | [37] |
| Taibaienoside VI               | C <sub>47</sub> H <sub>74</sub> O <sub>18</sub> | 926.4875  | 925.4802  | [37] |
| Taibaienoside VII              | C <sub>55</sub> H <sub>88</sub> O <sub>23</sub> | 1116.5716 | 1115.5643 | [37] |
| Taibaienoside VIII             | C <sub>57</sub> H <sub>92</sub> O <sub>23</sub> | 1144.6029 | 1143.5956 | [37] |
| Taibaienoside IX               | C <sub>47</sub> H <sub>76</sub> O <sub>17</sub> | 912.5083  | 911.5010  | [4]  |
| Tarasaponin III                | C <sub>48</sub> H <sub>76</sub> O <sub>19</sub> | 882.4977  | 881.4904  | [2]  |
| Tarasaponin VI                 | C <sub>41</sub> H <sub>64</sub> O <sub>13</sub> | 764.4347  | 763.4274  | [2]  |
| Tragopogonoside B              | C <sub>42</sub> H <sub>66</sub> O <sub>15</sub> | 810.4402  | 809.4329  | [38] |
| Yuzhizioside IV                | C <sub>52</sub> H <sub>84</sub> O <sub>21</sub> | 1044.5505 | 1043.5432 | [17] |
| Zingibroside R1 dimethyl ester | C <sub>44</sub> H <sub>70</sub> O <sub>14</sub> | 822.4766  | 821.4693  | [36] |
| $\alpha$ -Hederin              | C <sub>41</sub> H <sub>66</sub> O <sub>12</sub> | 750.4554  | 749.4481  | [25] |
| Congmuyenoside I               | C <sub>42</sub> H <sub>68</sub> O <sub>14</sub> | 764.4609  | 763.4536  | [23] |
| Congmuyenoside II              | C <sub>48</sub> H <sub>78</sub> O <sub>19</sub> | 958.5137  | 957.5064  | [23] |
| Congmuyenoside III             | C <sub>60</sub> H <sub>98</sub> O <sub>29</sub> | 1282.6193 | 1281.6120 | [23] |
| Congmuyenoside IV              | C <sub>42</sub> H <sub>68</sub> O <sub>15</sub> | 812.4558  | 811.4485  | [23] |

---

**Table S2.** Triterpene saponins annotated in the extracts of *Aralia elata* var. *mandshurica* (Rupr. & Maxim.) J. Wen roots by reversed ultra phase high performance liquid chromatography-mass spectrometry (RP-UHPLC-QqTOF-MS) in untargeted SWATH experiments (with the inclusion list containing the *m/z* of all predicted [M-H]<sup>-</sup> ions using published data)

| No | t <sub>R</sub><br>(min) | <i>m/z</i> [M-H] <sup>-</sup> -<br>observed | <i>m/z</i> [M-H] <sup>-</sup> -<br>calculated | Elemental<br>composition<br>[M-H] <sup>-</sup>                | MS2 fragmentation patterns - product ions, <i>m/z</i> (rel.<br>intensity)                                                   | Δ <i>m</i><br>(ppm) | Assignment               |
|----|-------------------------|---------------------------------------------|-----------------------------------------------|---------------------------------------------------------------|-----------------------------------------------------------------------------------------------------------------------------|---------------------|--------------------------|
| 3  | 3.7                     | 749.4481                                    | 749.4482                                      | C <sub>41</sub> H <sub>65</sub> O <sub>12</sub> <sup>-</sup>  | 455.3532 (60%), 485.1508 (75%), 617.4060 (35%), 749.4481 (40%)                                                              | 0.13                | α-Heredin                |
| 4  | 3.4                     | 765.4443                                    | 765.4431                                      | C <sub>41</sub> H <sub>65</sub> O <sub>13</sub> <sup>-</sup>  | 471.3479 (30%), 959.3343 (20%), 633.4011 (15%), 757.3878 (100%), 765.4443 (17%)                                             | - 1.57              | Collinsonidin            |
| 5  | 3.5                     | 778.3300                                    | 778.4509                                      | C <sub>42</sub> H <sub>66</sub> O <sub>13</sub> <sup>•-</sup> | 425.1316 (10%), 455.3541 (20%), 485.1516 (65%), 778.3300 (60%)                                                              | 155                 | Acutoside A              |
| 6  | 4.9                     | 781.4171                                    | 781.4380                                      | C <sub>41</sub> H <sub>65</sub> O <sub>14</sub> <sup>-</sup>  | 387.2855 (90%), 401.2492 (20%), 619.3331 (10%), 665.3183 (15%), 779.4215 (10%), 777.4070 (9%), 780.4209 (8%), 781.4171 (5%) | 27                  | Congmuyenoside A         |
| 7  | 4.6                     | 809.4333                                    | 809.4329                                      | C <sub>42</sub> H <sub>65</sub> O <sub>15</sub> <sup>-</sup>  | 556.3175 (40%), 751.4649 (30%), 767.4594 (35%), 779.4564 (15%), 781.4732 (100%), 793.4362 (90%), 809.4333 (60%)             | -0.49               | Elatoside                |
| 8  | 3.3                     | 811.4519                                    | 811.4485                                      | C <sub>42</sub> H <sub>67</sub> O <sub>15</sub> <sup>-</sup>  | 345.2268 (100%), 471.5677 (15%), 485.1509 (30%), 721.3301 (20%), 777.3617 (28%), 809.4022 (45%), 811.4519 (48%)             | -4.2                | Congmuyenoside IV        |
| 9  | 3.8                     | 911.5015                                    | 911.5010                                      | C <sub>47</sub> H <sub>75</sub> O <sub>17</sub> <sup>-</sup>  | 455.3515 (20%), 617.4057 (15%), 749.4479 (20%), 77.4590 (18%), 911.5015 (100%)                                              | - 0.5               | Guaiacin B               |
| 10 | 4.5                     | 925.4814                                    | 925.4802                                      | C <sub>47</sub> H <sub>73</sub> O <sub>18</sub> <sup>-</sup>  | 455.3541 (3%), 569.3852 (30%), 613.3746 (10%), 775.4288 (4%), 794.4439 (2%), 925.4814 (100%)                                | -1.3                | Araloside A              |
| 11 | 3.5                     | 927.4955                                    | 927.4959                                      | C <sub>47</sub> H <sub>75</sub> O <sub>18</sub> <sup>-</sup>  | 471.3419 (20%), 633.4008 (20%), 747.4391 (18%), 765.4456 (20%), 795.4537 (40%), 927.4955 (100%)                             | 0.5                 | Araliasaponin I          |
| 12 | 5.1                     | 939.4618                                    | 939.4959                                      | C <sub>48</sub> H <sub>75</sub> O <sub>18</sub> <sup>-</sup>  | 569.3852 (10%), 631.3857 (26%), 793.4388 (40%), 847.4473 (20%), 865.4611 (25%), 939.4618 (100%)                             | 36                  | Araloside A methyl ester |
| 13 | 4.6                     | 941.4753                                    | 941.4752                                      | C <sub>47</sub> H <sub>73</sub> O <sub>19</sub> <sup>-</sup>  | 455.3509 (5%), 471.3465 (5%), 631.3852 (7%), 747.4331 (35%), 793.4388 (42%), 809.4331 (3%), 927.4957 (36%), 941.4753 (100%) | -0.1                | Armatoside B             |
| 14 | 3.8                     | 941.5046                                    | 941.5115                                      | C <sub>48</sub> H <sub>77</sub> O <sub>18</sub> <sup>-</sup>  | 456.3556 (3%), 585.3772 (5%), 617.4064 (7%), 779.4526 (20%), 925.4833 (16%), 941.5046 (100%)                                | 7.3                 |                          |

|    |     |           |           |                                                              |                                                                                                                                                                                    |      |                      |
|----|-----|-----------|-----------|--------------------------------------------------------------|------------------------------------------------------------------------------------------------------------------------------------------------------------------------------------|------|----------------------|
| 15 | 3.5 | 943.4905  | 943.4908  | C <sub>47</sub> H <sub>75</sub> O <sub>19</sub> <sup>-</sup> | 765.4419 (18%), 779.4282 (17%), 927.4974 (60%), 943.4905 (100%)                                                                                                                    | 0.3  | Araliasaponin II     |
| 16 | 3.9 | 953.5104  | 953.5115  | C <sub>49</sub> H <sub>77</sub> O <sub>18</sub> <sup>-</sup> | 455.3523 (15%), 617.4082 (12%), 749.4462 (18%), 795.4536 (9%), 822.4728 (9%), 893.4927 (10%), 911.5016 (30%), 925.4814 (26%), 953.5104 (100%)                                      | 1.2  | Taibaienoside II     |
| 17 | 4.9 | 955.4890  | 955.4908  | C <sub>48</sub> H <sub>74</sub> O <sub>19</sub> <sup>-</sup> | 454.3310 (3%), 594.3418 (5%), 761.4049 (6%), 793.4257 (10%), 823.3948 (5%), 913.4877 (9%), 925.4790 (25%), 955.4890(100%)                                                          | 1.9  | Clendulagluconide C  |
| 18 | 4.4 | 957.4942  | 957.5067  | C <sub>48</sub> H <sub>77</sub> O <sub>19</sub> <sup>-</sup> | 791.4209 (10%), 925.4787 (13%), 955.4912 (100%), 957.4942 (15%)                                                                                                                    | 13   | Congmuyanoside B     |
| 19 | 4.5 | 1043.5432 | 1043.5432 | C <sub>52</sub> H <sub>83</sub> O <sub>21</sub> <sup>-</sup> | 569.3822 (15%), 613.3765 (8%), 731.4388 (9%), 775.4326 (12%), 925.4788 (100%), 1043.5432 (9%)                                                                                      | 0    | Yuzhizioside IV      |
| 20 | 4.4 | 1057.5363 | 1057.5225 | C <sub>52</sub> H <sub>81</sub> O <sub>22</sub> <sup>-</sup> | 455.3532 (2%), 551.3732 (3%), 585.3641 (3%), 701.4259 (7%), 745.4197 (3%), 895.4713 (15%), 911.5030 (5%), 955.4884 (3%), 1057.5363 (100%)                                          | 13   | Araloside B          |
| 21 | 4.2 | 1087.5337 | 1087.5335 | C <sub>53</sub> H <sub>83</sub> O <sub>23</sub> <sup>-</sup> | 455.3501 (2%), 551.3726 (2%), 702.42875 (2%), 775.4270 (2%), 793.4383 (1.5%), 925.4798 (8%), 956.4949 (5%), 1087.5337 (100%)                                                       | -0.6 | Araloside C          |
| 22 | 4.5 | 1089.5476 | 1089.5487 | C <sub>53</sub> H <sub>85</sub> O <sub>23</sub> <sup>-</sup> | 455.3521 (2%), 587.3969 (5%), 719.4372 (20%), 749.4493 (13%), 881.4925 (100%), 925.4795 (12%), 1043.5444 (35%), 1089.5476 (30%)                                                    | 1    | Araliasaponin III    |
| 23 | 5.1 | 1117.5419 | 1117.5436 | C <sub>54</sub> H <sub>85</sub> O <sub>24</sub> <sup>-</sup> | 959.3599 (15%), 749.4479 (10%), 793.4357 (35%), 866.4649 (15%), 919.4631 (7%), 937.4834 (50%), 955.4900 (51%), 1013.5322 (47%), 1057.5603 (36%), 1099.5340 (55%), 1117.5419 (100%) | 1.5  | Calendulaglycoside A |
| 24 | 4.0 | 1119.5585 | 1119.5593 | C <sub>54</sub> H <sub>87</sub> O <sub>24</sub>              | 609.3126 (10%), 775.4263 (5%), 955.4899 (7%), 1087.5365 (3%), 1119.5585 (100%)                                                                                                     | 0.7  | Araliasaponin IV     |
| 25 | 3.4 | 1249.5862 | 1249.5859 | C <sub>59</sub> H <sub>93</sub> O <sub>28</sub>              | 763.4331 (10%), 795.4525 (11%), 925.4817 (100%), 1249.5862 (95%)                                                                                                                   | -0.2 | Araliaarmoside       |

**Table S3.** List of compounds confirmed by MS<sup>2</sup> analysis in the roots of *Aralia elata* var. *mandshurica* (Rupr. & Maxim.) J. Wen

| Compound Name                                                                                          | t <sub>R</sub> | <i>m/z</i> [M-H] <sup>-</sup><br>observed | <i>m/z</i> [M-H] <sup>-</sup><br>of aglycone |
|--------------------------------------------------------------------------------------------------------|----------------|-------------------------------------------|----------------------------------------------|
| Guaiacin B                                                                                             | 3.8            | 911.4993                                  | 455.3507                                     |
| Kalopanax-Saponin F                                                                                    | 3.9            | 1087.5317                                 | 455.3509                                     |
| Oleanolic acid-3- <i>O</i> -(triglucopyranosyl-1-3-arabinopyranosyl)-28-1-glucopyranosyl               | 3.8            | 1235.6107                                 | 455.3522                                     |
| Calendulaglycoside A                                                                                   | 3.9            | 1117.5490                                 | 455.3499                                     |
| Araliaarmoside                                                                                         | 4.0            | 1249.5869                                 | 455.3487                                     |
| Calendulaglycoside C                                                                                   | 4.3            | 955.4859                                  | 455.3511                                     |
| Araloside B                                                                                            | 4.4            | 1057.549                                  | 455.3517                                     |
| Oleanolic acid-3- <i>O</i> -(diglucopyranosyl-1-3-arabinopyranosyl)-28-1-glucopyranosyl ester          | 4.3            | 1073.5569                                 | 455.3518                                     |
| Oleanolic acid-3- <i>O</i> -(methyldioxy-trihexopyranosyl-1-3-pentopyranosyl)-28-1-hexopyranosyl ester | 4.3            | 1119.5606                                 | 455.3521                                     |
| Oleanolic acid-3- <i>O</i> -(hexosyl)-28-1-hexouronide ester                                           | 4.6            | 793.4312                                  | 455.3471                                     |
| Araliasaponin III                                                                                      | 4.5            | 1089.5493                                 | 455.3501                                     |
| Araloside A                                                                                            | 5.3            | 925.4805                                  | 455.3508                                     |
| Oleanolic acid 3- <i>O</i> -hexuronide-(1-3-penta-furanoside)                                          | 5.7            | 763.4260                                  | 455.3502                                     |

**Table S4.** Triterpene saponins annotated in the extracts of *Aralia elata* var. *mandshurica* (Rupr. & Maxim.) J. Wen roots by reversed phase ultra-high performance liquid chromatography-mass spectrometry and tandem mass spectrometry (RP-UHPLC-QqTOF-MS and MS/MS) in SWATH and data-dependent acquisition (DDA) experiments

| Nº | t <sub>R</sub><br>(min) | m/z<br>[M-H] <sup>-</sup><br>observed | m/z<br>[M-H] <sup>-</sup><br>calculated | Elemental<br>composition<br>[M-H] <sup>-</sup>               | MS2 fragmentation patterns - product ions, m/z<br>(rel. intensity)                                         | Δm<br>(ppm) | Assignment                                                                                          | Ref  | Suppl.<br>spectra |
|----|-------------------------|---------------------------------------|-----------------------------------------|--------------------------------------------------------------|------------------------------------------------------------------------------------------------------------|-------------|-----------------------------------------------------------------------------------------------------|------|-------------------|
| 1  | 7.8                     | 911.4993                              | 911.501                                 | C <sub>47</sub> H <sub>75</sub> O <sub>17</sub> <sup>-</sup> | 455.3507 (20), 617.4041 (15), 749.4472 (15), 911.4993 (100)                                                | 1.9         | Guaiacin B isomer 1                                                                                 | [30] | S1-1              |
| 2  | 7.9                     | 1087.5317                             | 1087.5331                               | C <sub>53</sub> H <sub>83</sub> O <sub>23</sub> <sup>-</sup> | 455.3509 (10), 701.4265 (5), 925.4814 (15), 1087.5317 (100)                                                | 1.3         | Kalopanax-Saponin<br>F isomer 1                                                                     | [31] | S1-2              |
| 3  | 8.0                     | 1235.6107                             | 1235.6066                               | C <sub>59</sub> H <sub>95</sub> O <sub>27</sub> <sup>-</sup> | 455.3522 (50), 617.4059 (15), 749.4492 (100), 911.5035 (10), 1235.6107 (10)                                | -3.3        | Oleanolic acid-3-O-<br>(triglucopyranosyl-1-<br>3-arabinopyranosyl)-<br>28-1-glucopyranosyl         |      | S1-3              |
| 4  | 8.2                     | 1117.539                              | 1117.5436                               | C <sub>54</sub> H <sub>85</sub> O <sub>24</sub> <sup>-</sup> | 455.3499 (3), 731.4347 (5), 955.4898 (10), 1117.5390 (100)                                                 | 4.1         | Calendulaglycoside<br>A                                                                             | [15] | S1-4              |
| 5  | 8.4                     | 1249.5869                             | 1249.5859                               | C <sub>59</sub> H <sub>93</sub> O <sub>28</sub> <sup>-</sup> | 455.3487 (5), 701.4254 (15), 925.4743 (7), 1057.5219 (80), 1087.5337 (50), 1153.5538 (100), 1249.5869 (70) | -0.8        | Araliaarmoside                                                                                      | [8]  | S1-5              |
| 6  | 8.4                     | 1087.5336                             | 1087.5331                               | C <sub>53</sub> H <sub>83</sub> O <sub>23</sub> <sup>-</sup> | 455.3509 (10), 701.4265 (5), 925.4814 (15), 1087.55336 (100)                                               | -0.5        | Kalopanax-Saponin<br>F isomer 2                                                                     | [31] | S1-2              |
| 7  | 8.6                     | 955.4859                              | 955.4908                                | C <sub>48</sub> H <sub>75</sub> O <sub>19</sub> <sup>-</sup> | 455.3511 (5), 569.379 (5), 793.4317 (15), 955.4859 (100)                                                   | 5.1         | Calendulaglycoside<br>C isomer 1                                                                    | [15] | S1-6              |
| 8  | 8.7                     | 1057.5249                             | 1057.5225                               | C <sub>52</sub> H <sub>81</sub> O <sub>22</sub> <sup>-</sup> | 455.3517 (5), 701.4286 (7), 763.4309 (5), 895.4698 (7), 1057.5249 (100)                                    | -2.3        | Araloside B isomer 2                                                                                | [11] | S1-7              |
| 9  | 8.9                     | 1073.5569                             | 1073.5538                               | C <sub>53</sub> H <sub>85</sub> O <sub>22</sub> <sup>-</sup> | 455.3518 (50), 617.4052 (20), 749.4485 (30), 911.5022 (100), 1073.5569 (15)                                | -2.9        | Oleanolic acid-3-O-<br>(diglucopyranosyl-1-<br>3-arabinopyranosyl)-<br>28-1-glucopyranosyl<br>ester |      | S1-8              |
| 10 | 8.9                     | 1119.5606                             | 1119.5616                               | C <sub>54</sub> H <sub>87</sub> O <sub>24</sub> <sup>-</sup> | 455.3521 (5), 617.4057 (5), 749.4490 (7), 911.5019 (100), 1073.5551 (15), 1119.5606 (13)                   | 0.9         | Oleanolic acid-3-O-<br>(ethyl-<br>trihexopyranosyl-1-<br>3-pentopyranosyl)-                         |      | S1-9              |



|    |      |           |           |                                                              |                                                                             |      |                                                              |      |       |
|----|------|-----------|-----------|--------------------------------------------------------------|-----------------------------------------------------------------------------|------|--------------------------------------------------------------|------|-------|
|    |      |           |           |                                                              |                                                                             |      | 28-1-hexopyranosyl ester                                     |      |       |
| 11 | 9.0  | 793.4312  | 793.438   | C <sub>42</sub> H <sub>65</sub> O <sub>14</sub> <sup>-</sup> | 455.3471 (10), 631.3785 (15), 793.4312 (100)                                | 8.6  | Oleanolic acid-3-O-(hexosyl)-28-1-hexouronide ester isomer 1 |      | S1-10 |
| 12 | 9.3  | 1089.5493 | 1089.5487 | C <sub>53</sub> H <sub>85</sub> O <sub>23</sub> <sup>-</sup> | 455.3501 (5), 719.4360 (10), 881.4901 (100), 1043.5437 (12), 1089.5493 (12) | -0.6 | Araliasaponin III                                            | [6]  | S1-11 |
| 13 | 10.1 | 955.4899  | 955.4908  | C <sub>48</sub> H <sub>75</sub> O <sub>19</sub> <sup>-</sup> | 455.3511 (5), 569.379 (5), 793.4317 (15), 955.4899 (100)                    | 0.9  | Calendulaglycoside C isomer 2                                | [15] | S1-6  |
| 14 | 10.3 | 925.4805  | 925.4802  | C <sub>47</sub> H <sub>73</sub> O <sub>18</sub> <sup>-</sup> | 455.3508 (2), 569.3831 (5), 731.4366 (20), 925.4803 (100)                   | 0.3  | Araloside A isomer 1                                         | [11] | S1-12 |
| 15 | 10.4 | 925.4807  | 925.4802  | C <sub>47</sub> H <sub>73</sub> O <sub>18</sub> <sup>-</sup> | 455.3508 (2), 569.3831 (5), 731.4366 (20), 925.4803 (100)                   | 0.5  | Araloside A isomer 2                                         | [11] | S1-12 |
| 16 | 10.8 | 895.4696  | -         | -                                                            | 455.3508 (5), 551.3731 (5), 895.4696 (100)                                  | -    | Oleanolic acid unknown derivatives                           |      | S1-13 |
| 17 | 10.8 | 793.436   | 793.438   | C <sub>42</sub> H <sub>65</sub> O <sub>14</sub> <sup>-</sup> | 455.3471 (10), 631.3785 (15), 793.4312 (100)                                | 2.5  | Oleanolic acid-3-O-(hexosyl)-28-1-hexouronide ester isomer 2 |      | S1-10 |
| 18 | 10.9 | 763.426   | 763.4274  | C <sub>41</sub> H <sub>63</sub> O <sub>13</sub> <sup>-</sup> | 455.3502 (3), 631.3822 (5), 763.4260 (100)                                  | 1.8  | Oleanolic acid 3-O-hexuronide-(1-3-penta-furanoside)         |      | S1-14 |
| 19 | 11.0 | 911.5016  | 911.501   | C <sub>47</sub> H <sub>75</sub> O <sub>17</sub> <sup>-</sup> | 455.3507 (20), 617.4041 (15), 749.4472 (15), 911.5016 (100)                 | -0.7 | Guaiacin B isomer 2                                          | [30] | S1-1  |
| 20 | 11.0 | 911.4949  | 911.501   | C <sub>47</sub> H <sub>75</sub> O <sub>17</sub> <sup>-</sup> | 455.3507 (20), 617.4041 (15), 749.4472 (15), 911.4949 (100)                 | 6.7  | Guaiacin B isomer 3                                          | [30] | S1-1  |

The extracts were prepared with conventional (water or ethanol) or natural deep eutectic solvents (NADES) and analyzed by a Waters ACQUITY UPLC I-Class UPLC System (Waters GmbH, Eschborn, Germany) coupled online to a hybrid quadrupole-time of flight mass spectrometer (QqTOF-MS) AB Sciex TripleTOF 6600 (AB Sciex, Darmstadt, Germany)

**Table S5.** The conditions of reverse phase-ultra high performance liquid chromatographic (RP-UHPLC) separation and the settings for electrospray ionization-quadrupole-time of flight mass spectrometry (ESI-QqTOF-MS) applied for the profiling (untargeted analysis) of *Aralia elata* var. *mandshurica* (Rupr. & Maxim.) J. Wen root semi-polar secondary metabolites with QqTOF hybride mass spectrometer SHIMADZU LCMS-9030 System (SHIMADZU Corporation, Kyoto, Japan).

| Chromatography           |                                                                         |
|--------------------------|-------------------------------------------------------------------------|
| SIL-30AC Autosampler     |                                                                         |
| Injection mode           | Partial Loop                                                            |
| Injection volume         | 5 $\mu$ L                                                               |
| Wash solvent             | 50% MeOH                                                                |
| Wash solvent volume      | 300 $\mu$ L                                                             |
| Cooler temperature       | 4.0 C                                                                   |
| Rinse type               | Internal & external                                                     |
| Rinse mode               | Before and after aspiration                                             |
| Needle overfill flush    | Rinse port + rinse pump                                                 |
| Rinse time               | 2 sec                                                                   |
| Column conditions        |                                                                         |
| Separation column        | Phenomenex Kinetex C18 Column (100 x 2.1 mm, particle size 1.7 $\mu$ m) |
| Column oven temperature  | 40.0 C                                                                  |
| LC separation parameters |                                                                         |
| Eluent A                 | aqueous 0.1% (v/v) FA                                                   |
| Eluent B                 | 0.1% (v/v) FA in acetonitrile                                           |
| Flow rate                | 0.5 mL/min                                                              |

|                 |                                                    |
|-----------------|----------------------------------------------------|
| Elution program | gradient to 100% eluent B – 10 min                 |
|                 | 100% eluent B isocratic – 2 min                    |
|                 | gradient to 5% eluent B – 0.1 min                  |
|                 | 5% eluent B isocratic – 0.9 min (re-equilibration) |

---

### Mass spectrometry

---

#### General

|                    |                                                                                       |
|--------------------|---------------------------------------------------------------------------------------|
| Mass analyzer type | quadrupole-time of flight (QqTOF-MS)                                                  |
| Ionsource          | ESI                                                                                   |
| Experiment type    | Sequential Windowed Acquisition of All Theoretical<br>Fragment Ion Mass Spectra (DIA) |
| Operatinon mode    | positive, negative                                                                    |
| Cycle time (s)     | 0.996                                                                                 |
| Duration           | 10.0 min                                                                              |

---

#### Ion source settings

|                             |                          |
|-----------------------------|--------------------------|
| Nebulizer gas (L/min)       | 3                        |
| Drying gas (L/min)          | 10                       |
| Ion spray voltage (kV)      | 4.0/-3.0 (negative mode) |
| Ion source temperature (°C) | 180                      |

---

#### MS settings

|                        |            |
|------------------------|------------|
| Experiment type        | TOF-MS     |
| <i>m/z</i> range       | 240 - 1350 |
| Accumulation time (ms) | 100        |
| ID function            | ON         |

---

#### MS/MS Setting

---

|                                                                              |                             |
|------------------------------------------------------------------------------|-----------------------------|
| Experiment type                                                              | SWATH                       |
| Collision gas                                                                | Ar                          |
| MS/MS experiment type                                                        | DIA                         |
| SWATH window number                                                          | 28 u (650-1350 <i>m/z</i> ) |
| SWATH window width ( <i>m/z</i> )                                            | 25.0                        |
| CE                                                                           | 18-52 (35 ± 17 V)           |
| Accumulation time (ms)                                                       | 21                          |
| ID function                                                                  | OFF                         |
| Collision potential (V)                                                      | 35/-35 (negative mode)      |
| Collision energy spread (V)                                                  | 17 (negative mode)          |
| SWATH, sequential window acquisition of all theoretical fragment ion spectra |                             |

**Table S6.** The conditions of reversed phase-ultrahigh performance liquid chromatographic (RP-UHPLC) separation and the settings for electrospray ionization-quadrupole-time of flight mass spectrometry (ESI-QqTOF-MS) applied for the SWATH and DDA MS/MS analysis of *Aralia elata* var. *mandshurica* (Rupr. & Maxim.) J. Wen root semi-polar secondary metabolites with Waters ACQUITY UPLC I-Class UPLC System (Waters GmbH, Eschborn, Germany) coupled online to a hybrid quadrupole-time of flight mass spectrometer (QqTOF-MS) AB Sciex TripleTOF 6600 (AB Sciex, Darmstadt, Germany).

| Chromatography                       |                                                                         |
|--------------------------------------|-------------------------------------------------------------------------|
| ACQUITY Sample Manager (SM)          |                                                                         |
| Injection mode                       | Partial Loop                                                            |
| Injection volume                     | 5 $\mu$ L                                                               |
| Weak wash solvent                    | 0.3 mmol/L aq. ammonium formate, pH 3.5<br>(adjusted using formic acid) |
| Weak wash volume                     | 800 $\mu$ L                                                             |
| Strong wash solvent                  | acetonitrile                                                            |
| Strong wash volume                   | 400 $\mu$ L                                                             |
| Target sample temperature            | 4.0 C                                                                   |
| Needle overfill flush                | automatic                                                               |
| Column conditions                    |                                                                         |
| Separation column                    | EC 150/2 NUCLEOSHELL RP 18<br>(150 x 2 mm, particle size 2.7 $\mu$ m)   |
| Target column temperature            | 40.0 C                                                                  |
| ACQUITY Binary Solvent Manager (BSM) |                                                                         |
| Eluent A                             | 0.3 mmol/L aq. ammonium formate, pH 3.5<br>(adjusted using formic acid) |
| Eluent B                             | acetonitrile                                                            |

|                    |                                                                                                                                                                                               |
|--------------------|-----------------------------------------------------------------------------------------------------------------------------------------------------------------------------------------------|
| Seal wash duration | 5 min                                                                                                                                                                                         |
| Flow rate          | 0.4 mL/min                                                                                                                                                                                    |
| Elution program    | 5% eluent B isocratic - 2 min<br>gradient to 95% eluent B – 17 min<br>95% eluent B isocratic – 2 min<br>gradient to 5% eluent B – 0.1 min<br>5% eluent B isocratic – 3 min (re-equilibration) |

---

### Mass spectrometry

---

#### General

---

|                           |                                                                                         |
|---------------------------|-----------------------------------------------------------------------------------------|
| Mass analyzer type        | quadrupole-time of flight (QqTOF-MS)                                                    |
| Ionsource                 | DuoSpray™ ion source                                                                    |
| Experiment type           | Sequential Windowed Acquisition of All Theoretical<br>Fragment Ion Mass Spectra (SWATH) |
| Operatinon mode           | negative                                                                                |
| Cycle time (s)            | 1.1                                                                                     |
| Pause between ranges (ms) | 1.049                                                                                   |
| Auto adjust with mass     | on                                                                                      |
| Settling time (s)         | 0                                                                                       |
| Time bins to sum          | 4                                                                                       |
| Duration                  | 23 min                                                                                  |

---

#### Ion source settings

---

|                      |    |
|----------------------|----|
| Nebulizer gas (psig) | 60 |
| Drying gas (psig)    | 70 |
| Curtain gas (psig)   | 55 |

|                                                          |                                        |
|----------------------------------------------------------|----------------------------------------|
| Ion spray voltage (kV)                                   | -4.5                                   |
| Ion source temperature (°C)                              | 450                                    |
| <b>MS settings</b>                                       |                                        |
| Experiment type                                          | TOF-MS                                 |
| <i>m/z</i> range                                         | 65 - 1250                              |
| Accumulation time (ms)                                   | 50/75 (SWATH/DDA)                      |
| Declustering potential (V)                               | -35                                    |
| Collision potential (V)                                  | -10                                    |
| <b>MS/MS Setting</b>                                     |                                        |
| Fragmentation mode                                       | collision-activated dissociation (CAD) |
| MS/MS experiment type                                    | DDA                                    |
| For ions greater than                                    | 100 Da                                 |
| Charge state                                             | 1-2                                    |
| With intensity greater than                              | 3000                                   |
| Maximum number of candidate<br>ions to monitor per cycle | 5                                      |
| Exclude former target ions for                           | 4 sec                                  |
| Fragment intensity multiplier                            | 2                                      |
| Maximum accumulation                                     | 2 sec                                  |
| Analyte type                                             | small molecules                        |
| Accumulation time (ms)                                   | 175                                    |
| Declustering potential (V)                               | -35                                    |
| Collision potential (V)                                  | -45                                    |
| Collision energy spread (V)                              | 35                                     |
| Ion release delay (V)                                    | -30                                    |

|                       |     |
|-----------------------|-----|
| Ion release width (V) | -15 |
|-----------------------|-----|

---

|                      |  |
|----------------------|--|
| <b>MS/MS Setting</b> |  |
|----------------------|--|

---

|                    |                                        |
|--------------------|----------------------------------------|
| Fragmentation mode | collision-activated dissociation (CAD) |
|--------------------|----------------------------------------|

|                       |       |
|-----------------------|-------|
| MS/MS experiment type | SWATH |
|-----------------------|-------|

|                     |    |
|---------------------|----|
| SWATH window number | 15 |
|---------------------|----|

|                                   |    |
|-----------------------------------|----|
| SWATH window width ( <i>m/z</i> ) | 80 |
|-----------------------------------|----|

|                                     |   |
|-------------------------------------|---|
| SWATH window overlap ( <i>m/z</i> ) | 1 |
|-------------------------------------|---|

|                          |     |
|--------------------------|-----|
| Rolling collision energy | off |
|--------------------------|-----|

|              |                 |
|--------------|-----------------|
| Analyte type | small molecules |
|--------------|-----------------|

|                        |    |
|------------------------|----|
| Accumulation time (ms) | 60 |
|------------------------|----|

|                            |     |
|----------------------------|-----|
| Declustering potential (V) | -35 |
|----------------------------|-----|

|                         |     |
|-------------------------|-----|
| Collision potential (V) | -45 |
|-------------------------|-----|

|                             |    |
|-----------------------------|----|
| Collision energy spread (V) | 35 |
|-----------------------------|----|

|                       |     |
|-----------------------|-----|
| Ion release delay (V) | -30 |
|-----------------------|-----|

|                       |     |
|-----------------------|-----|
| Ion release width (V) | -15 |
|-----------------------|-----|

---



## Figures

Chromatographic and mass spectral data of triterpene saponins annotated in the extracts of *Aralia elata* var. *mandshurica* (Rupr. & Maxim.) J. Wen roots by reversed phase ultra-high performance liquid chromatography-mass spectrometry and tandem mass spectrometry (RP-UHPLC-QqTOF-MS and MS/MS) in SWATH and data-dependent acquisition (DDA) experiments

A

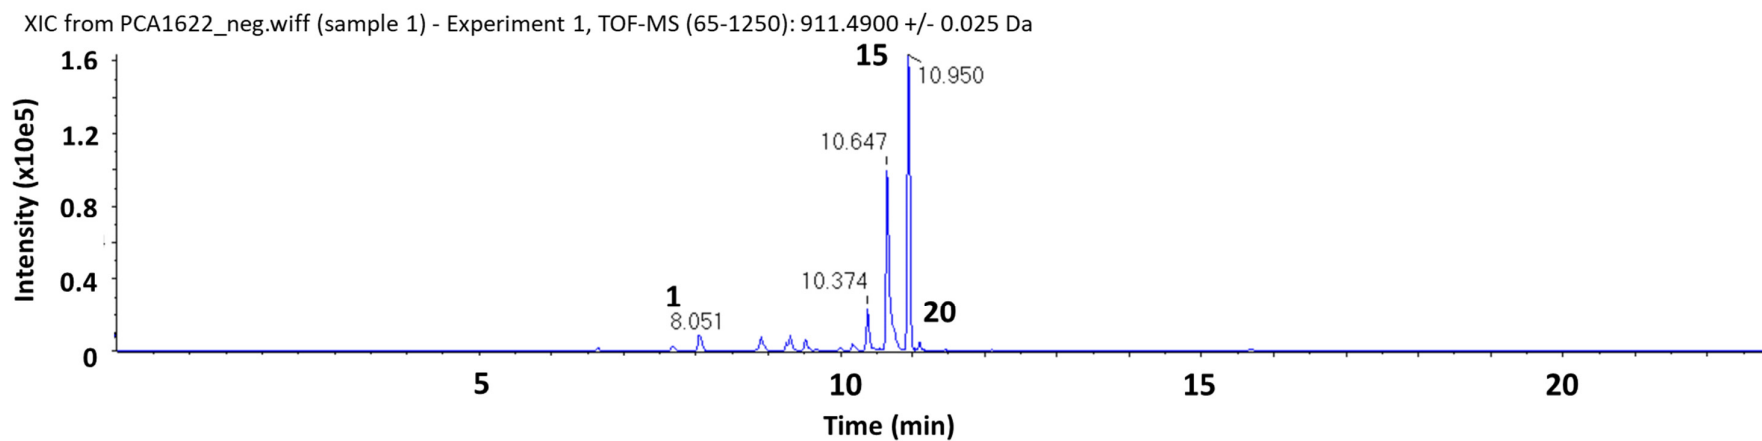

**B**

Spectrum from PCA1622\_neg.wiff (sample 1) – PCA1622\_DDA\_neg, Experiment 1, - TOF MS (65-1250) from 7.695 min

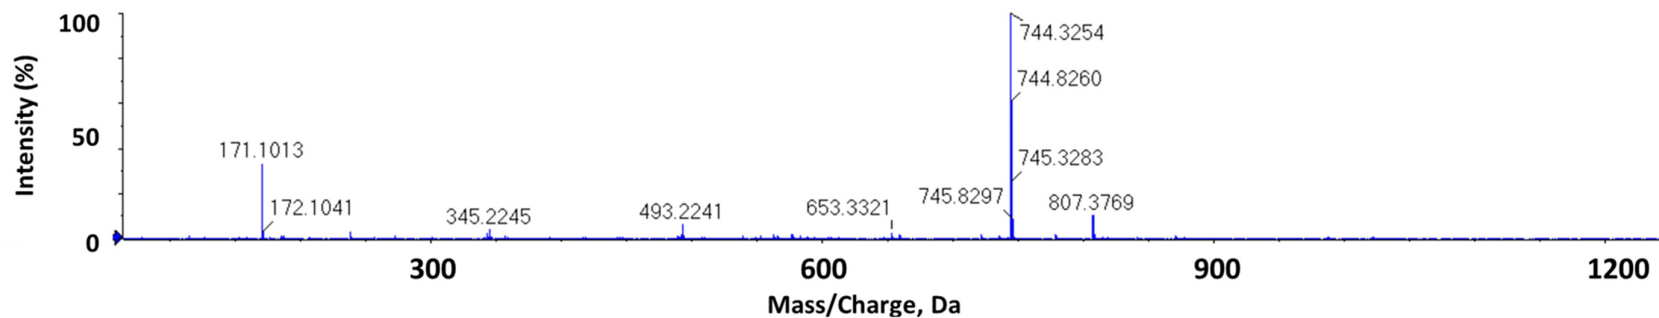

Spectrum from PCA1622\_neg.wiff (sample 1) – PCA1622\_DDA\_neg, Experiment 1, - TOF MS (65-1250) from 10.950 min

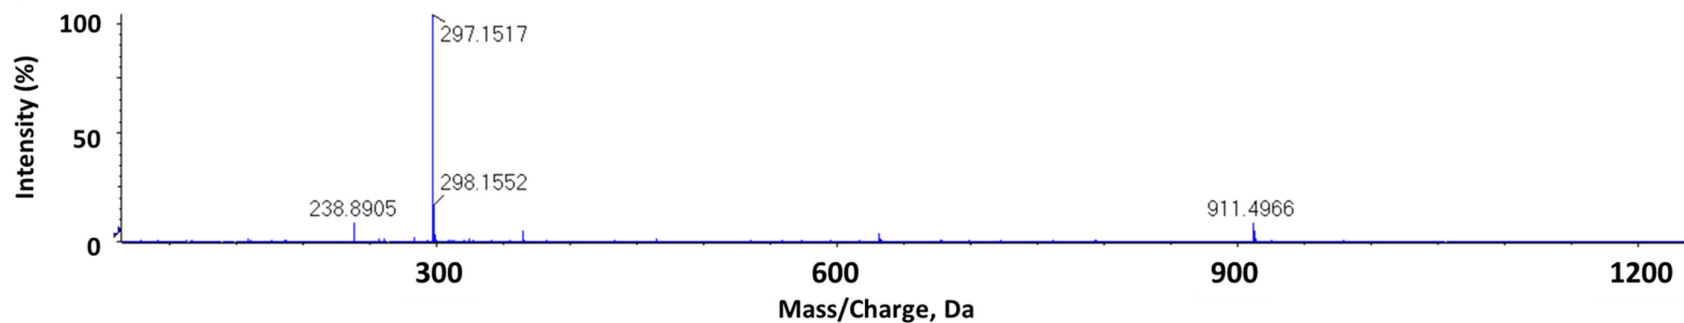

Spectrum from PCA1622\_neg.wiff (sample 1) – PCA1622\_DDA\_neg, Experiment 1, - TOF MS (65-1250) from 11.093 min

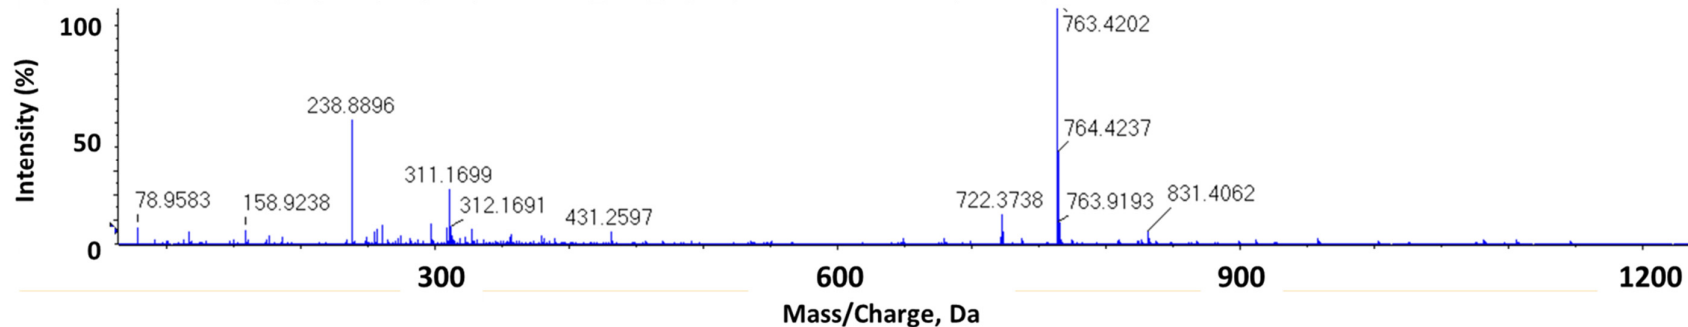

C

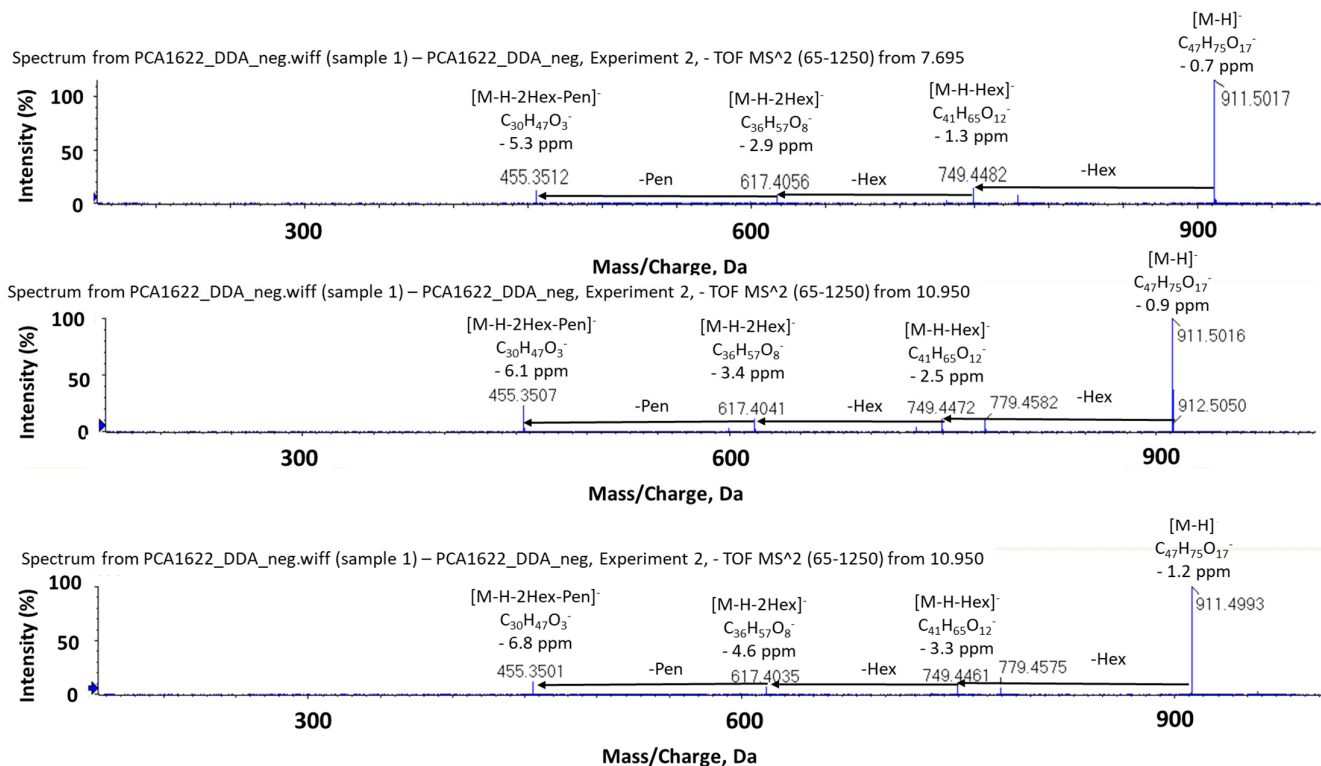

**Figure S1.** Extracted ion chromatogram (XIC) of  $m/z$  911.5000  $\pm$  0.02 (A), the MS spectra (B) and MS/MS fragmentation patterns (C) of the compounds 1, 15, 20 annotated in the total ethanolic extract of *Aralia elata* var. *mandshurica* (Rupr. & Maxim.) J. Wen roots as guaiacin B isomers at  $t_R$  7.77, 10.98 and 11.01, respectively. The analysis relied on RP-UHPLC-QqTOF-MS accomplished with a Waters ACQUITY I-Class UPLC System (Waters GmbH, Eschborn, Germany) coupled on-line to a Triple-TOF6600 hybrid mass spectrometer (Sciex, Darmstadt, Germany) in the negative ion mode. Metabolites were annotated by reversed phase ultra-high performance liquid chromatography-mass spectrometry and tandem mass spectrometry (RP-UHPLC-QqTOF-MS and MS/MS) in targeted data-dependent acquisition (DDA) experiments (with the inclusion list containing the  $m/z$  of all predicted [M-H]<sup>-</sup> ions annotated at the MS1 level).

**A**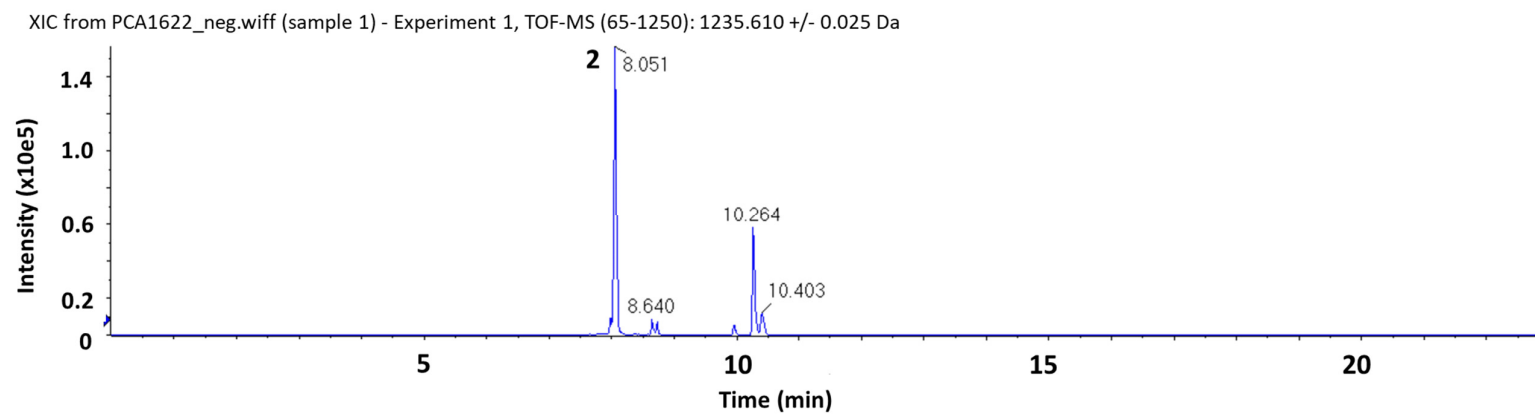**B**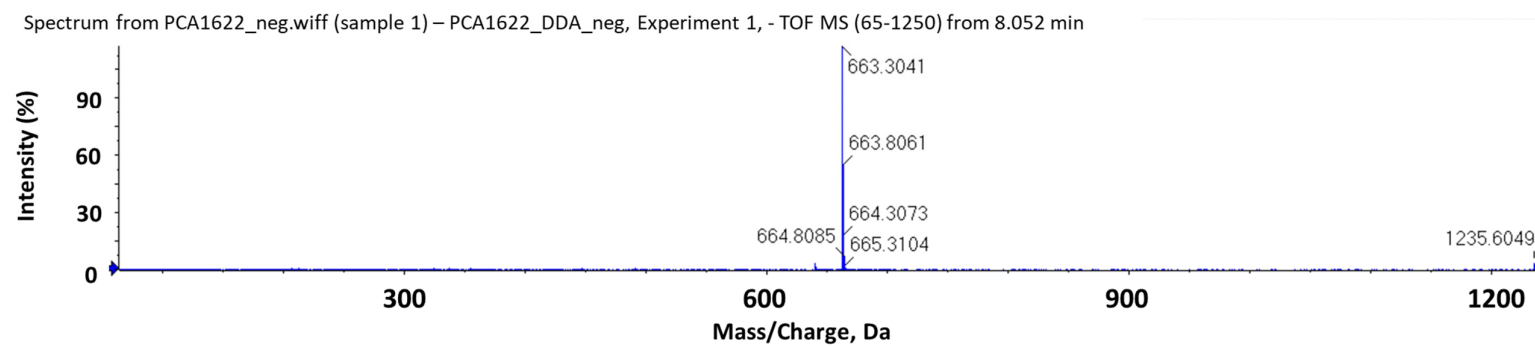

C

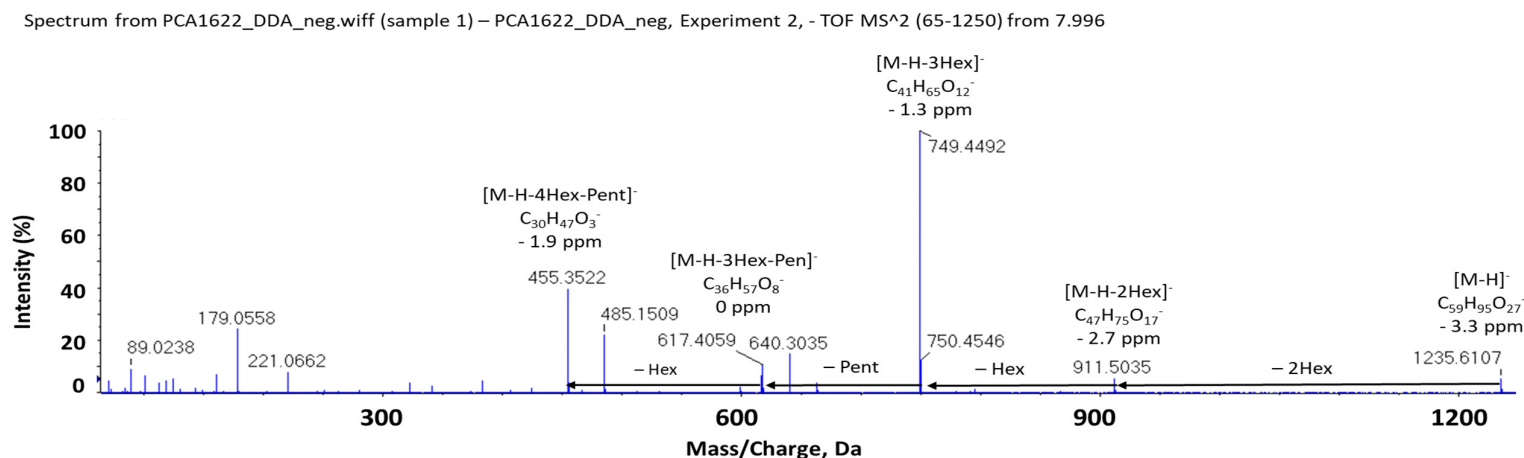

**Figure S2.** Extracted ion chromatogram  $m/z$  1235.6100  $\pm$  0.02 (A), the MS spectra (B) and MS/MS fragmentation patterns (C) of the compounds 2 annotated in the total ethanolic extract of *Aralia elata* var. *mandshurica* (Rupr. & Maxim.) J. Wen roots as oleanolic acid-3-*O*-(triglucopyranosyl-1-3-arabinopyranosyl)-28-1-glucopyranosyl. The analysis relied on RP-UHPLC-QqTOF-MS accomplished with a Waters ACQUITY I-Class UPLC System (Waters GmbH, Eschborn, Germany) coupled on-line to a Triple-TOF6600 hybrid mass spectrometer (Sciex, Darmstadt, Germany) in the negative ion mode. Metabolites were annotated by reversed phase ultra-high performance liquid chromatography-mass spectrometry and tandem mass spectrometry (RP-UHPLC-QqTOF-MS and MS/MS) in targeted data-dependent acquisition (DDA) experiments (with the inclusion list containing the  $m/z$  of all predicted  $[M-H]^-$  ions annotated at the MS1 level).

A

XIC from PCA1622\_neg.wiff (sample 1) - Experiment 1, TOF-MS (65-1250): 1087.5400 +/- 0.025 Da

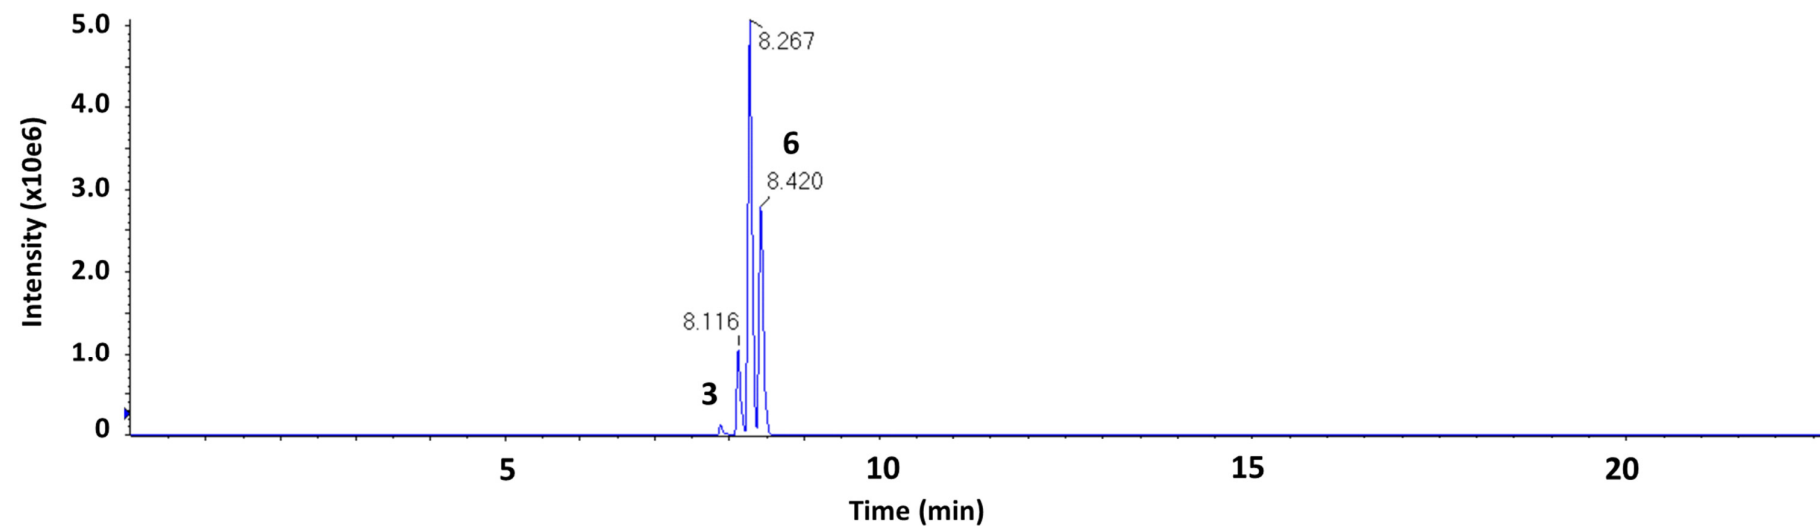

**B**

Spectrum from PCA1622\_neg.wiff (sample 1) – PCA1622\_DDA\_neg, Experiment 1, - TOF MS (65-1250) from 8.104 min

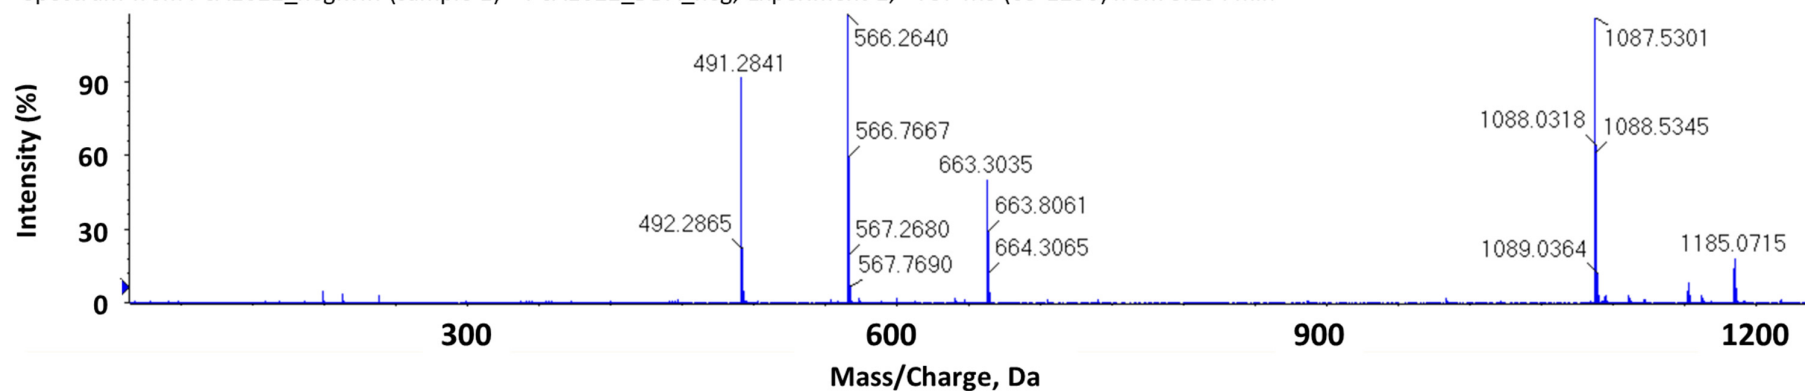

Spectrum from PCA1622\_neg.wiff (sample 1) – PCA1622\_DDA\_neg, Experiment 1, - TOF MS (65-1250) from 8.425 min

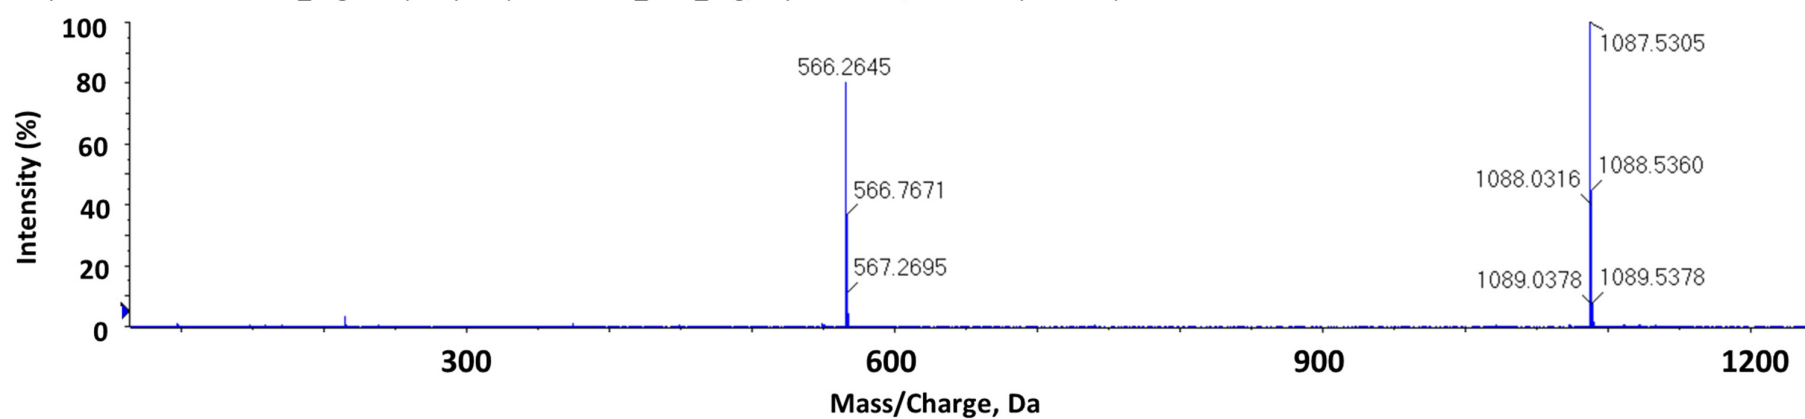

C

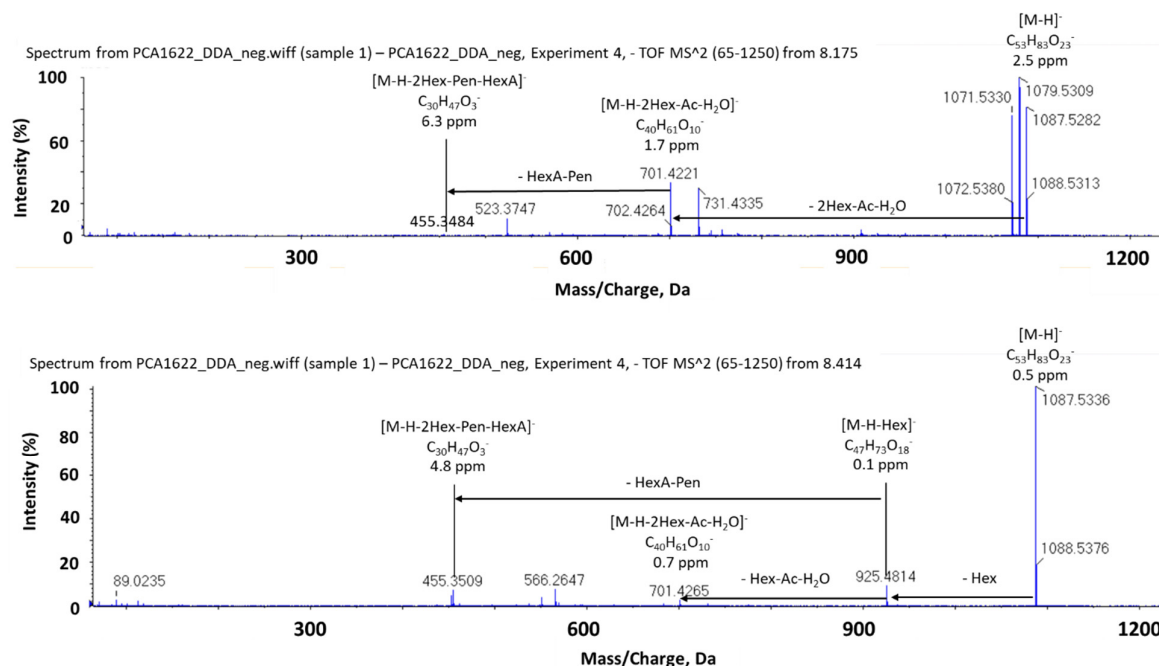

**Figure S3.** Extracted ion chromatogram  $m/z$  1087.5400  $\pm$  0.02 (A), the MS spectra (B) and MS/MS fragmentation patterns (C) of the compounds 3, 6 annotated in the total ethanolic extract of *Aralia elata* var. *mandshurica* (Rupr. & Maxim.) J. Wen roots as kalopanax-saponin F isomers at  $t_R$  7.89 and 8.41, respectively. The analysis relied on RP-UHPLC-QqTOF-MS accomplished with a Waters ACQUITY I-Class UPLC System (Waters GmbH, Eschborn, Germany) coupled on-line to a Triple-TOF6600 hybrid mass spectrometer (Sciex, Darmstadt, Germany) in the negative ion mode. Metabolites were annotated by reversed phase ultra-high performance liquid chromatography-mass spectrometry and tandem mass spectrometry (RP-UHPLC-QqTOF-MS and MS/MS) in targeted data-dependent acquisition (DDA) experiments (with the inclusion list containing the  $m/z$  of all predicted  $[M-H]^-$  ions annotated at the MS1 level).



A

XIC from PCA1622\_neg.wiff (sample 1) - Experiment 1, TOF-MS (65-1250): 1117.5400 +/- 0.025 Da

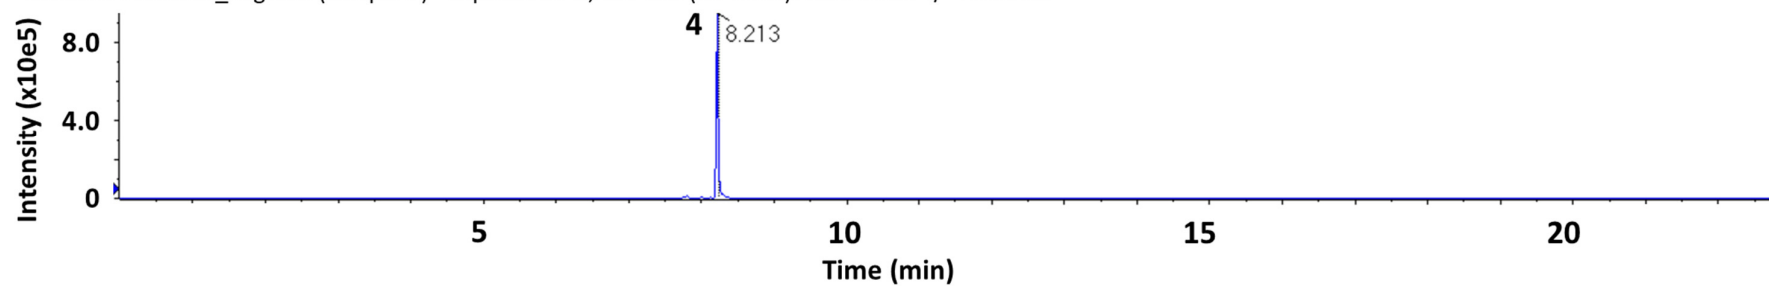

B

Spectrum from PCA1622\_neg.wiff (sample 1) - PCA1622\_DDA\_neg, Experiment 1, - TOF MS (65-1250) from 8.232 min

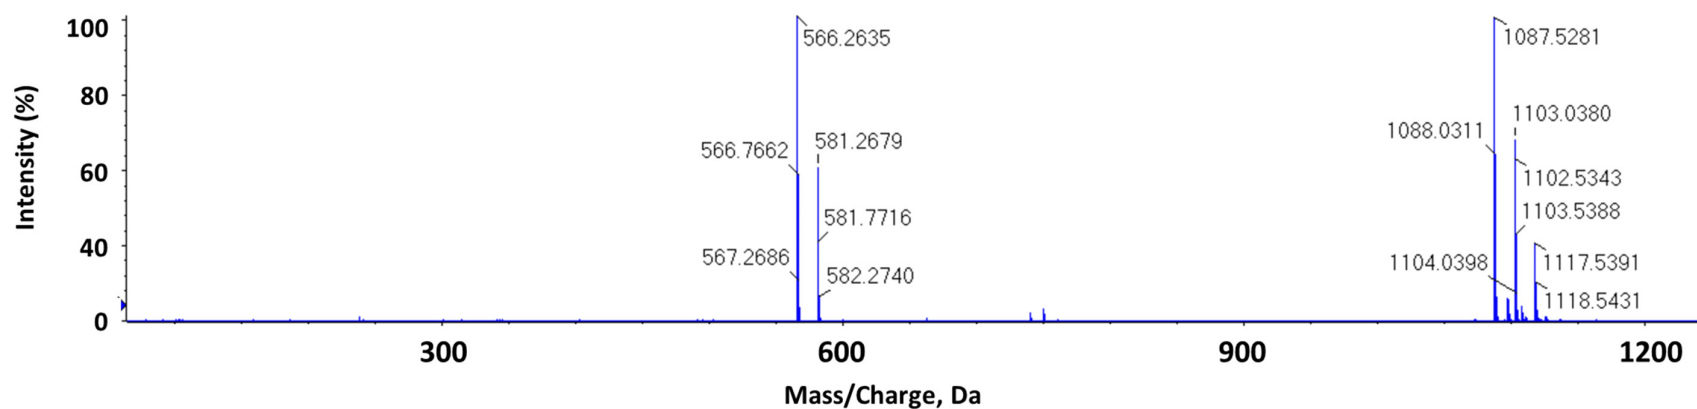

C

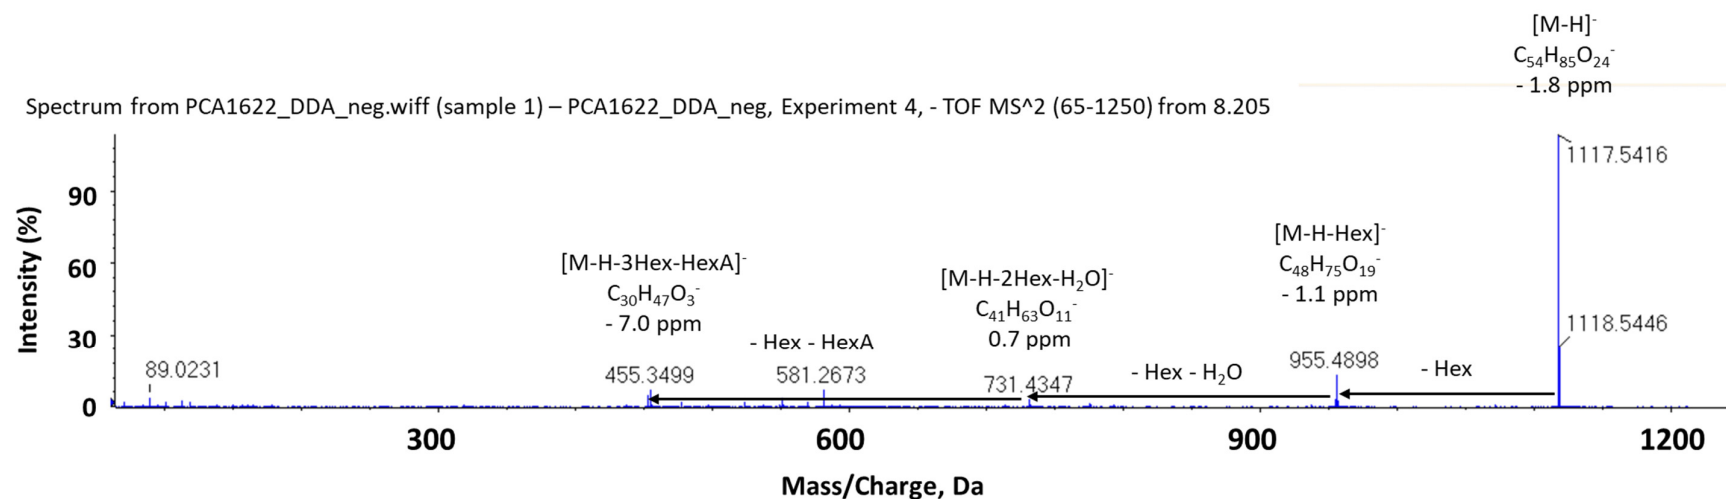

**Figure S4.** Extracted ion chromatogram  $m/z$   $1117.5400 \pm 0.02$  (A), the MS spectra (B) and MS/MS fragmentation patterns (C) of the compounds 4 annotated in the total ethanolic extract of *Aralia elata* var. *mandshurica* (Rupr. & Maxim.) J. Wen roots as calendulaglycoside A. The analysis relied on RP-UHPLC-QqTOF-MS accomplished with a Waters ACQUITY I-Class UPLC System (Waters GmbH, Eschborn, Germany) coupled on-line to a Triple-TOF6600 hybrid mass spectrometer (Sciex, Darmstadt, Germany) in the negative ion mode. Metabolites were annotated by reversed phase ultra-high performance liquid chromatography-mass spectrometry and tandem mass spectrometry (RP-UHPLC-QqTOF-MS and MS/MS) in targeted data-dependent acquisition (DDA) experiments (with the inclusion list containing the  $m/z$  of all predicted [M-H]<sup>-</sup> ions annotated at the MS1 level).

**A**

XIC from PCA1622\_neg.wiff (sample 1) - Experiment 1, TOF-MS (65-1250): 1249.580 +/- 0.025 Da

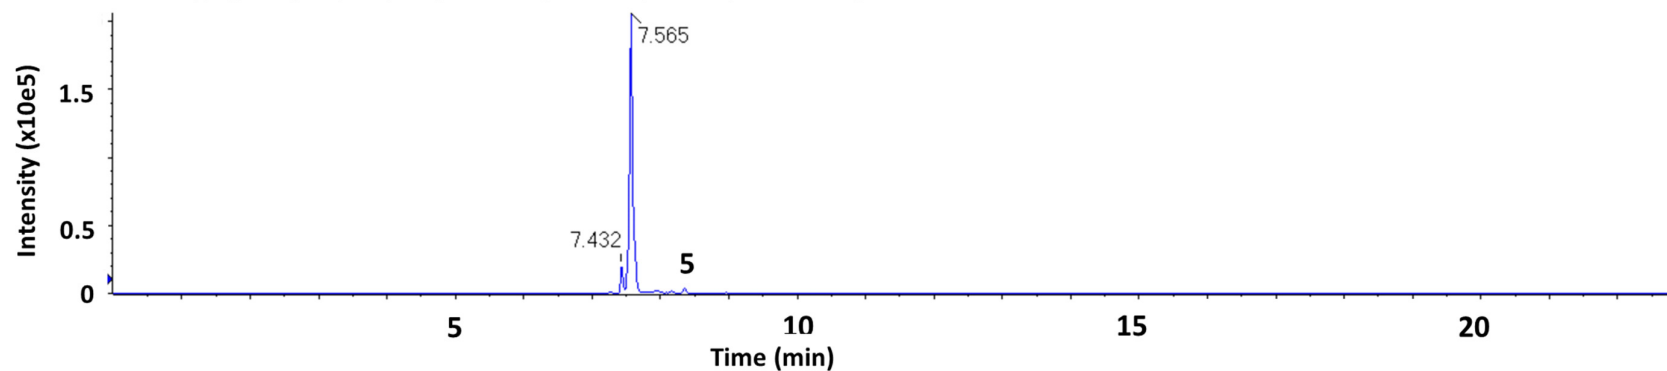

**B**

Spectrum from PCA1622\_neg.wiff (sample 1) - PCA1622\_DDA\_neg, Experiment 1, - TOF MS (65-1250) from 7.552 min

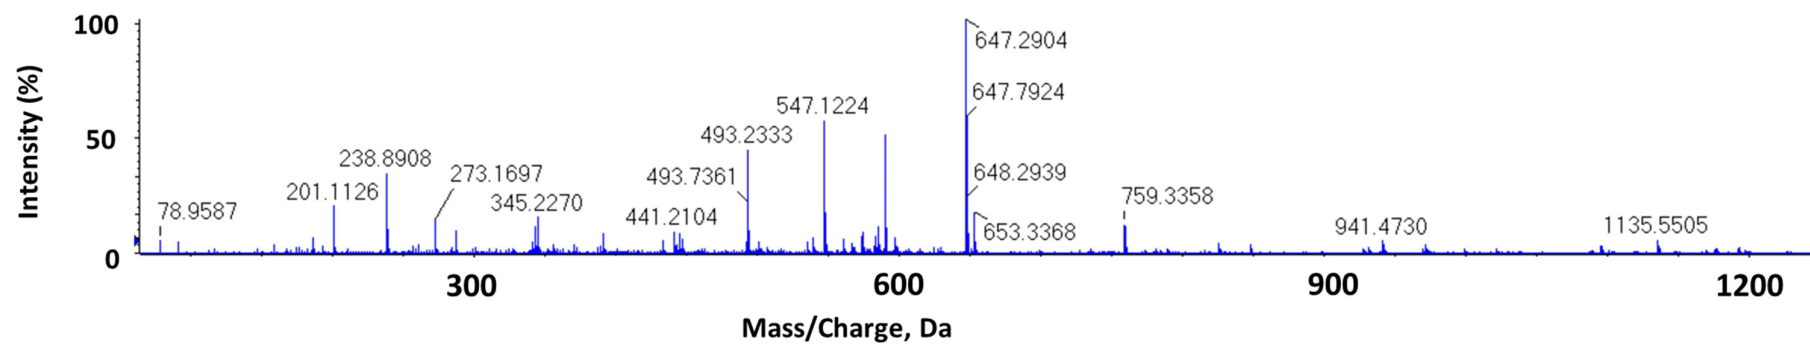

C

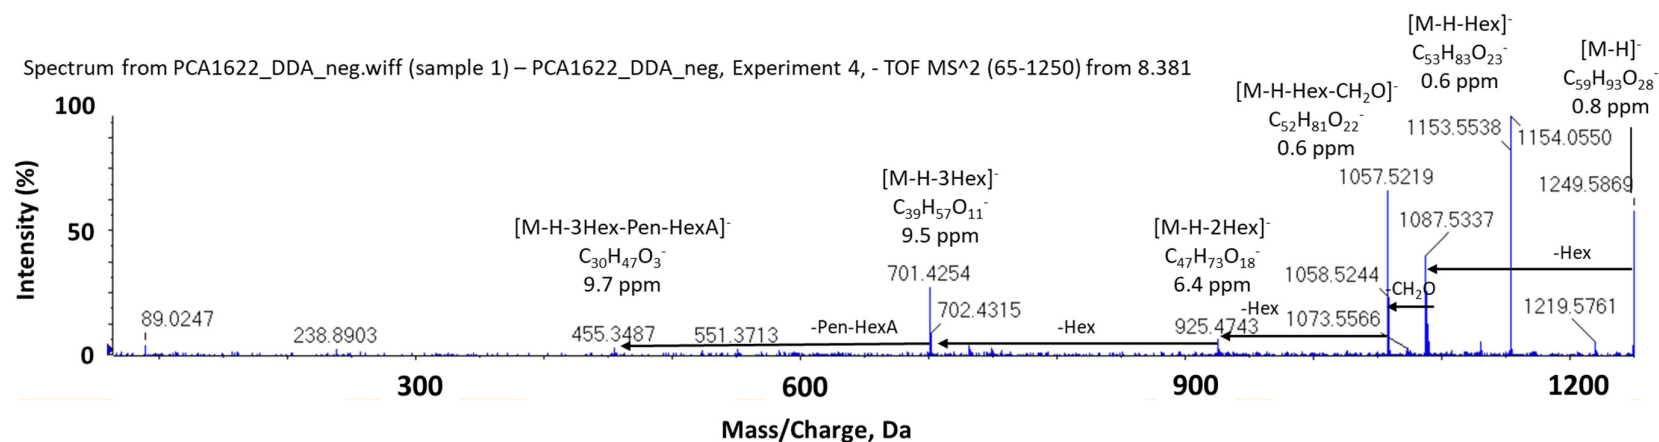

**Figure S5.** Extracted ion chromatogram  $m/z$  1249.5900  $\pm$  0.02 (A), the MS spectra (B) and MS/MS fragmentation patterns (C) of the compounds 5 annotated in the total ethanolic extract of *Aralia elata* var. *mandshurica* (Rupr. & Maxim.) J. Wen roots as araliaarmoside. The analysis relied on RP-UHPLC-QqTOF-MS accomplished with a Waters ACQUITY I-Class UPLC System (Waters GmbH, Eschborn, Germany) coupled on-line to a Triple-TOF6600 hybrid mass spectrometer (Sciex, Darmstadt, Germany) in the negative ion mode. Metabolites were annotated by reversed phase ultra-high performance liquid chromatography-mass spectrometry and tandem mass spectrometry (RP-UHPLC-QqTOF-MS and MS/MS) in targeted data-dependent acquisition (DDA) experiments (with the inclusion list containing the  $m/z$  of all predicted  $[M-H]^-$  ions annotated at the MS1 level).

A

XIC from PCA1622\_neg.wiff (sample 1) - Experiment 1, TOF-MS (65-1250): 955.4800 +/- 0.025 Da

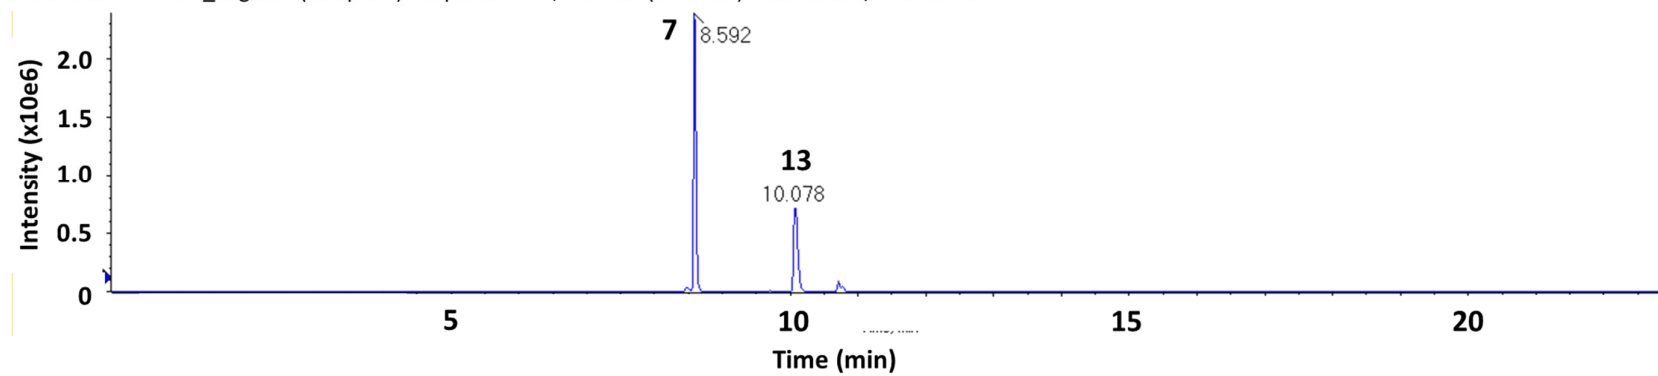

**B**

Spectrum from PCA1622\_neg.wiff (sample 1) – PCA1622\_DDA\_neg, Experiment 1, - TOF MS (65-1250) from 8.592 min

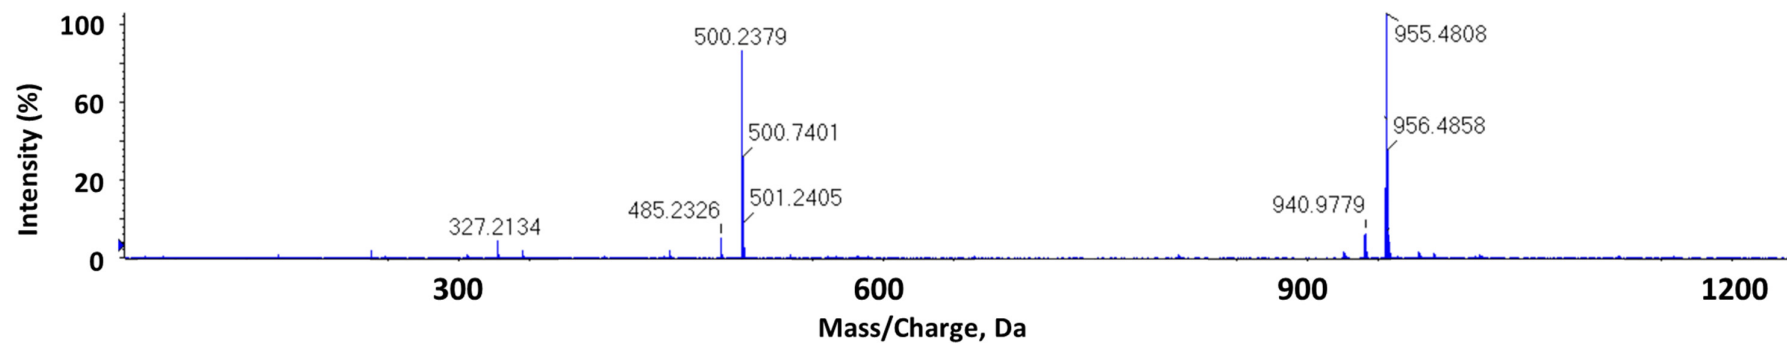

Spectrum from PCA1622\_neg.wiff (sample 1) – PCA1622\_DDA\_neg, Experiment 1, - TOF MS (65-1250) from 10.091 min

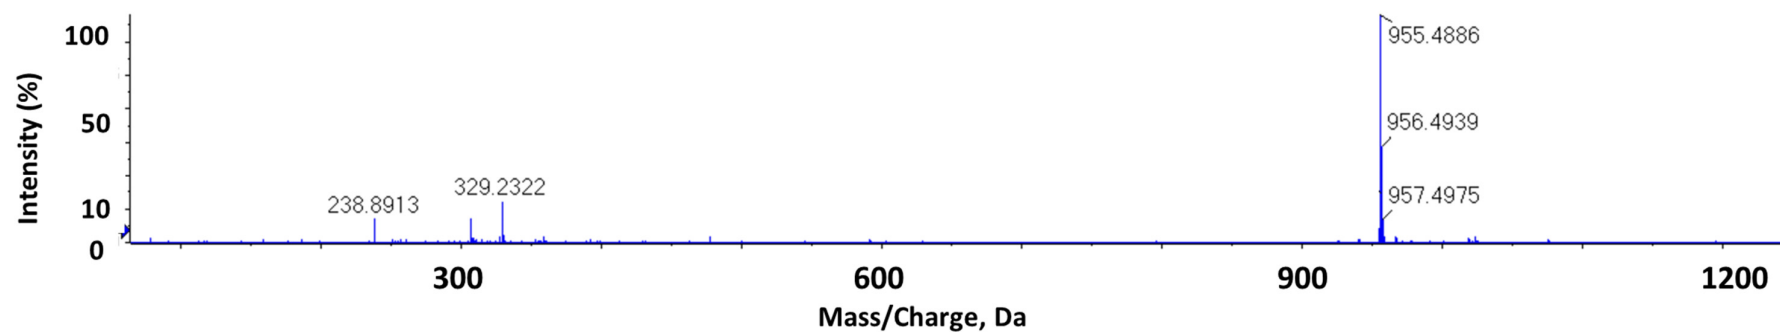

C

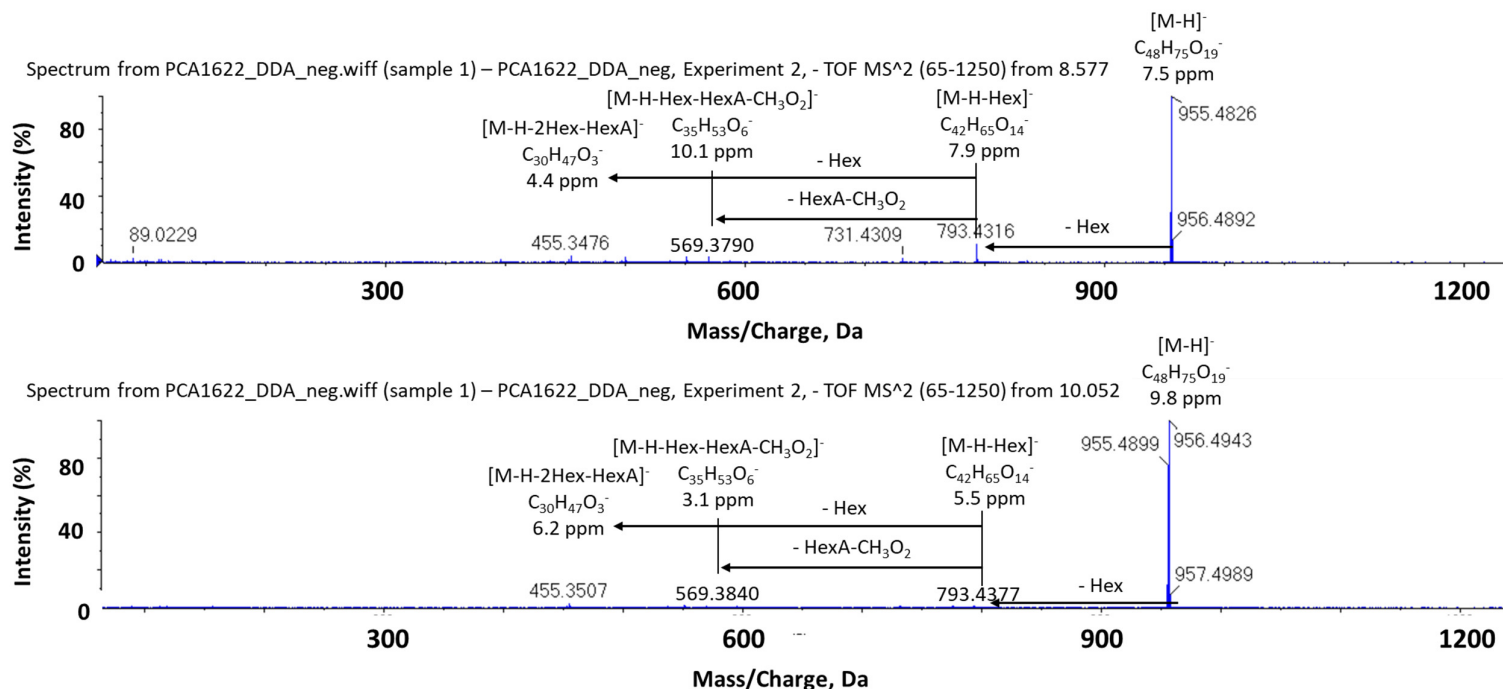

**Figure S6.** Extracted ion chromatogram  $m/z$  955.4900  $\pm$  0.02 (A), the MS spectra (B) and MS/MS fragmentation patterns (C) of the compounds 7, 13 annotated in the total ethanolic extract of *Aralia elata* var. *mandshurica* (Rupr. & Maxim.) J. Wen roots as calendulaglycoside C isomers at  $t_R$  8.59 and 10.07, respectively. The analysis relied on RP-UHPLC-QqTOF-MS accomplished with a Waters ACQUITY I-Class UPLC System (Waters GmbH, Eschborn, Germany) coupled on-line to a Triple-TOF6600 hybrid mass spectrometer (Sciex, Darmstadt, Germany) in the negative ion mode. Metabolites were annotated by reversed phase ultra-high performance liquid chromatography-mass spectrometry and tandem mass spectrometry (RP-UHPLC-QqTOF-MS and MS/MS) in targeted data-dependent acquisition (DDA) experiments (with the inclusion list containing the  $m/z$  of all predicted  $[M-H]^-$  ions annotated at the MS1 level).

A

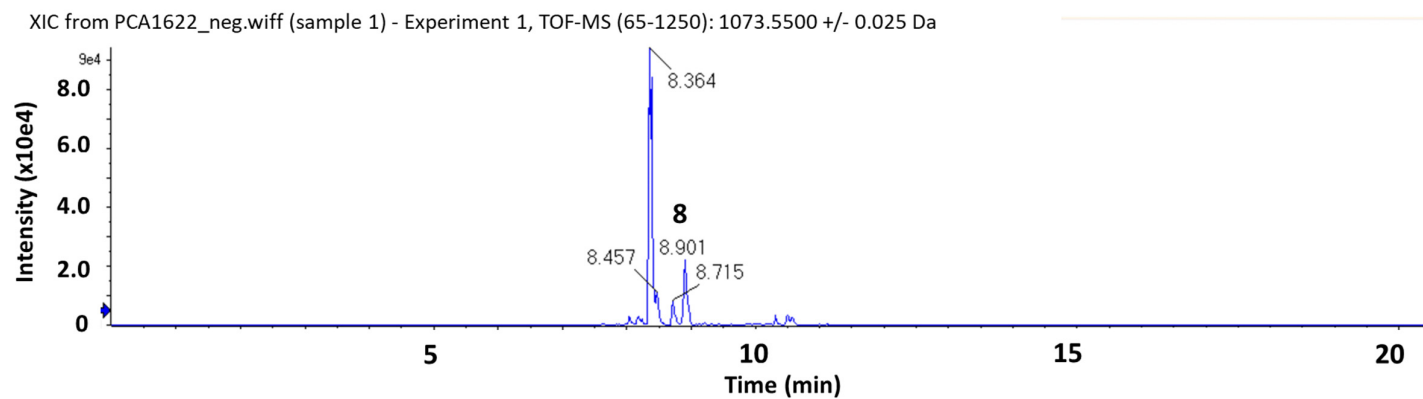

B

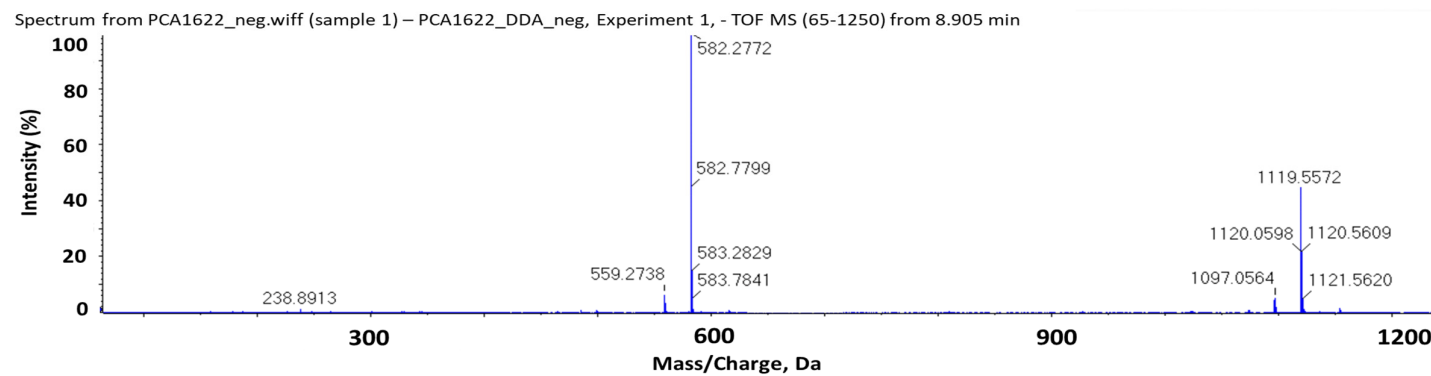



C

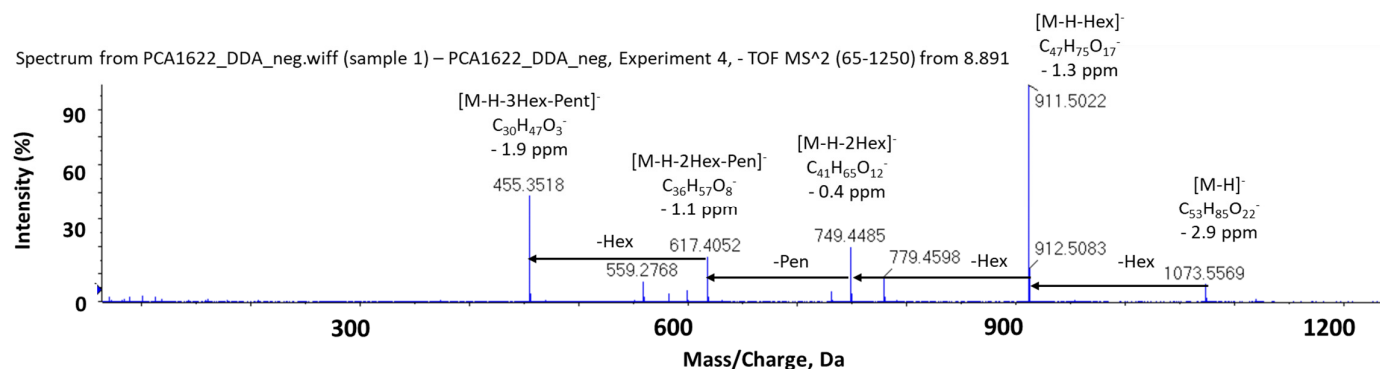

**Figure S7.** Extracted ion chromatogram  $m/z$  1073.5600  $\pm$  0.02 (A), the MS spectra (B) and MS/MS fragmentation patterns (C) of the compounds 8 annotated in the total ethanolic extract of *Aralia elata* var. *mandshurica* (Rupr. & Maxim.) J. Wen roots as oleanolic acid-3-*O*-(diglucopyranosyl-1-3-arabinopyranosyl)-28-*O*-glucopyranosyl ester. The analysis relied on RP-UHPLC-QqTOF-MS accomplished with a Waters ACQUITY I-Class UPLC System (Waters GmbH, Eschborn, Germany) coupled on-line to a Triple-TOF6600 hybrid mass spectrometer (Sciex, Darmstadt, Germany) in the negative ion mode. Metabolites were annotated by reversed phase ultra-high performance liquid chromatography-mass spectrometry and tandem mass spectrometry (RP-UHPLC-QqTOF-MS and MS/MS) in targeted data-dependent acquisition (DDA) experiments (with the inclusion list containing the  $m/z$  of all predicted [M-H]<sup>-</sup> ions annotated at the MS1 level).

**A**

XIC from PCA1622\_neg.wiff (sample 1) - Experiment 1, TOF-MS (65-1250): 1119.550 +/- 0.025 Da

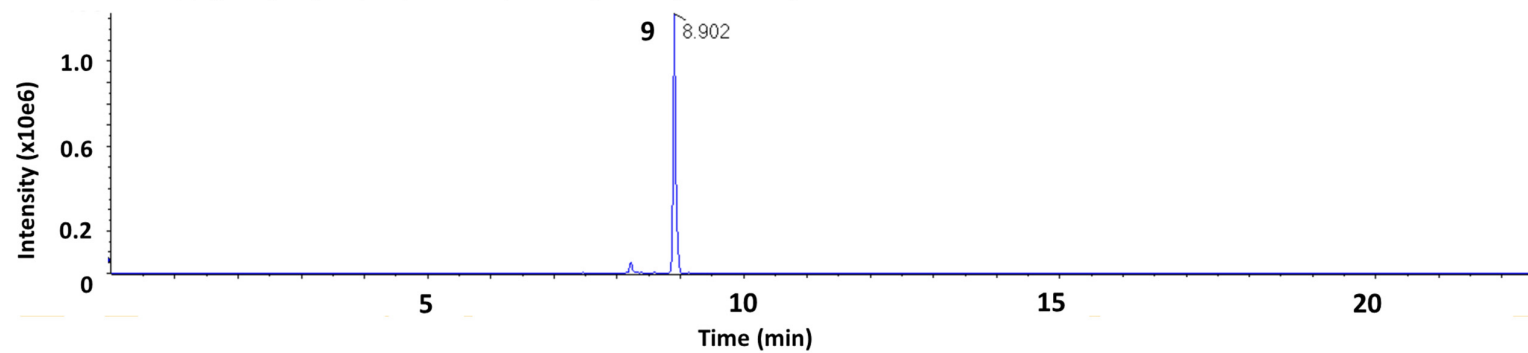**B**

Spectrum from PCA1622\_neg.wiff (sample 1) - PCA1622\_DDA\_neg, Experiment 1, - TOF MS (65-1250) from 8.710 min

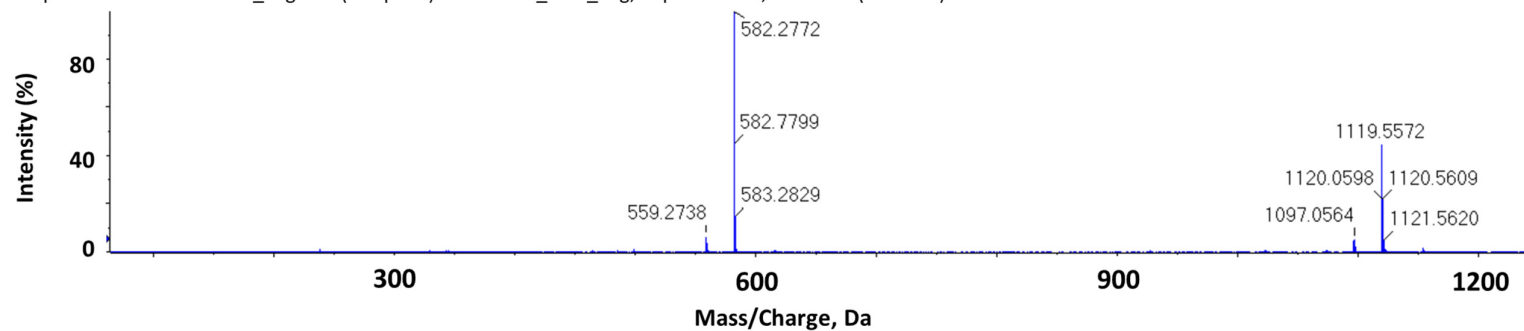

C

Spectrum from PCA1622\_DDA\_neg.wiff (sample 1) – PCA1622\_DDA\_neg, Experiment 4, - TOF MS<sup>2</sup> (65-1250) from 8.719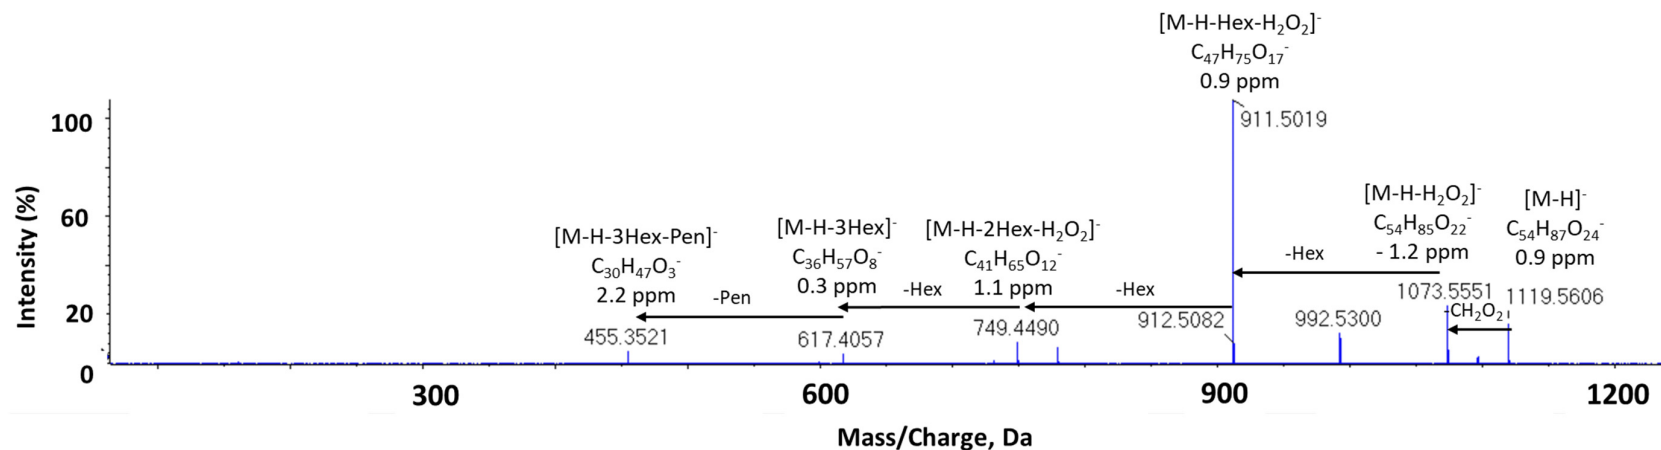

**Figure S8.** Extracted ion chromatogram  $m/z$  1119.5600  $\pm$  0.02 (A), the MS spectra (B) and MS/MS fragmentation patterns (C) of the compounds 9 annotated in the total ethanolic extract of *Aralia elata* var. *mandshurica* (Rupr. & Maxim.) J. Wen roots as oleanolic acid-3-*O*-(methyldioxy-trihexopyranosyl-1-3-pentopyranosyl)-28-1-hexopyranosyl ester. The analysis relied on RP-UHPLC-QqTOF-MS accomplished with a Waters ACQUITY I-Class UPLC System (Waters GmbH, Eschborn, Germany) coupled on-line to a Triple-TOF6600 hybrid mass spectrometer (Sciex, Darmstadt, Germany) in the negative ion mode. Metabolites were annotated by reversed phase ultra-high performance liquid chromatography-mass spectrometry and tandem mass spectrometry (RP-UHPLC-QqTOF-MS and MS/MS) in targeted data-dependent acquisition (DDA) experiments (with the inclusion list containing the  $m/z$  of all predicted  $[M-H]^-$  ions annotated at the MS1 level).

A

XIC from PCA1622\_neg.wiff (sample 1) - Experiment 1, TOF-MS (65-1250): 1057.5200 +/- 0.025 Da

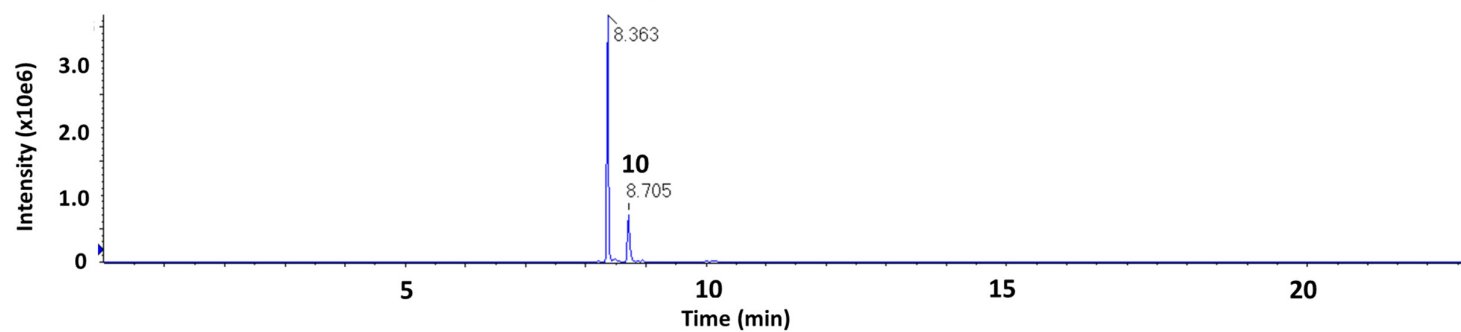

B

Spectrum from PCA1622\_neg.wiff (sample 1) – PCA1622\_DDA\_neg, Experiment 1, - TOF MS (65-1250) from 8.710 min

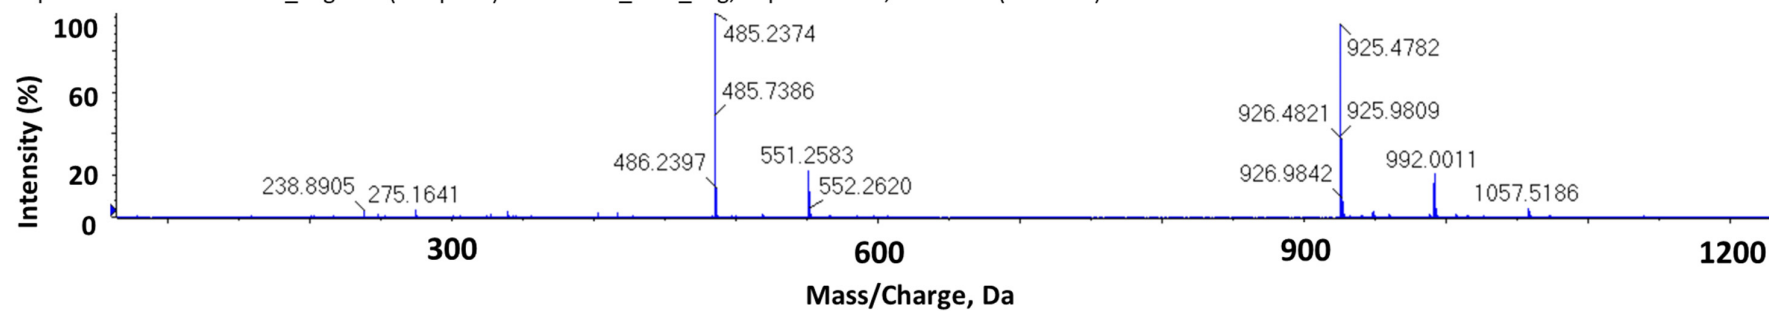

C

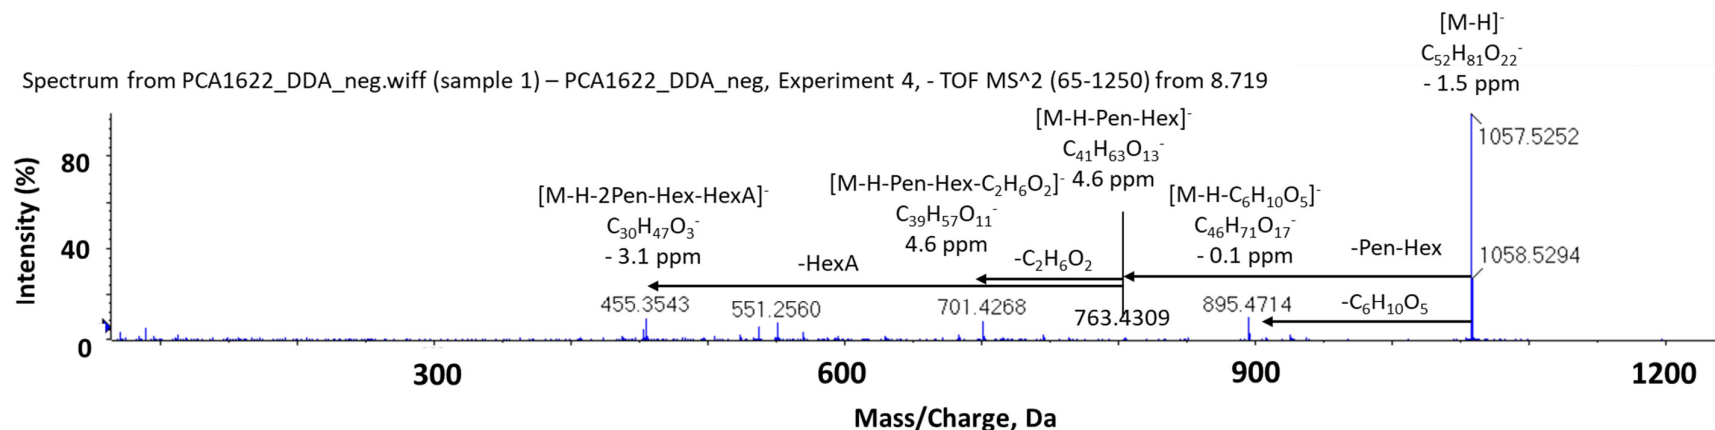

**Figure S9.** Extracted ion chromatogram  $m/z$   $1057.5300 \pm 0.02$  (A), the MS spectra (B) and MS/MS fragmentation patterns (C) of the compounds 10 annotated in the total ethanolic extract of *Aralia elata* var. *mandshurica* (Rupr. & Maxim.) J. Wen roots as araloside B. The analysis relied on RP-UHPLC-QqTOF-MS accomplished with a Waters ACQUITY I-Class UPLC System (Waters GmbH, Eschborn, Germany) coupled on-line to a Triple-TOF6600 hybrid mass spectrometer (Sciex, Darmstadt, Germany) in the negative ion mode. Metabolites were annotated by reversed phase ultra-high performance liquid chromatography-mass spectrometry and tandem mass spectrometry (RP-UHPLC-QqTOF-MS and MS/MS) in targeted data-dependent acquisition (DDA) experiments (with the inclusion list containing the  $m/z$  of all predicted  $[M-H]^-$  ions annotated at the MS1 level).

A

XIC from PCA1622\_neg.wiff (sample 1) - Experiment 1, TOF-MS (65-1250): 1089.540 +/- 0.025 Da

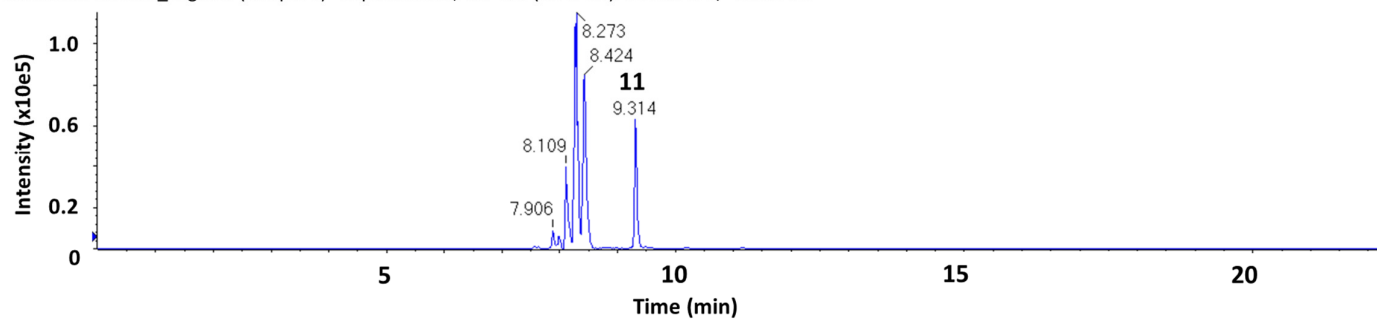

B

Spectrum from PCA1622\_neg.wiff (sample 1) – PCA1622\_DDA\_neg, Experiment 1, - TOF MS (65-1250) from 9.307 min

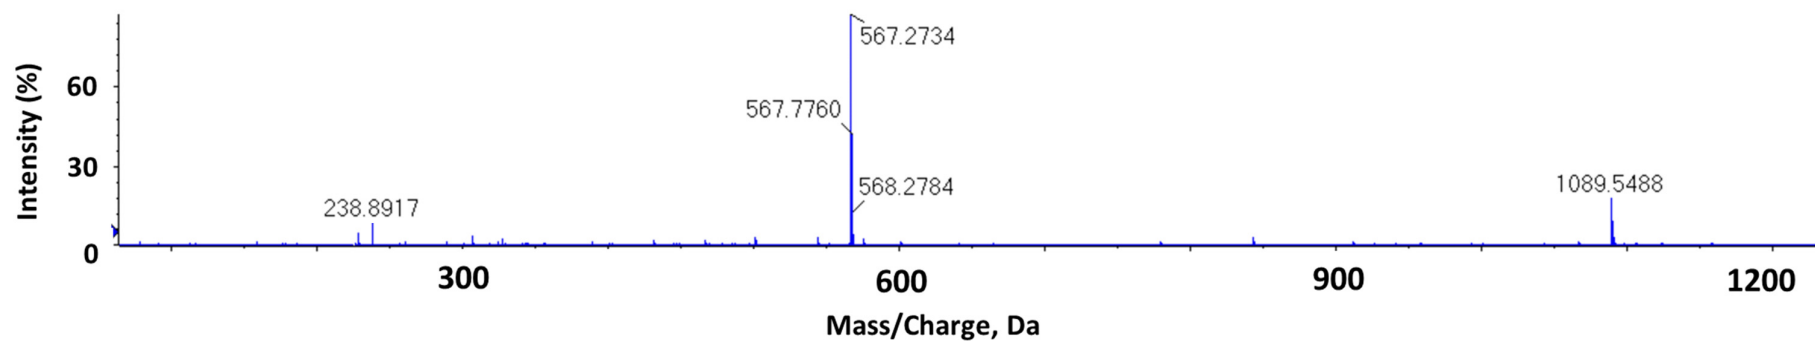

C

Spectrum from PCA1622\_DDA\_neg.wiff (sample 1) – PCA1622\_DDA\_neg, Experiment 4, - TOF MS<sup>2</sup> (65-1250) from 9.317

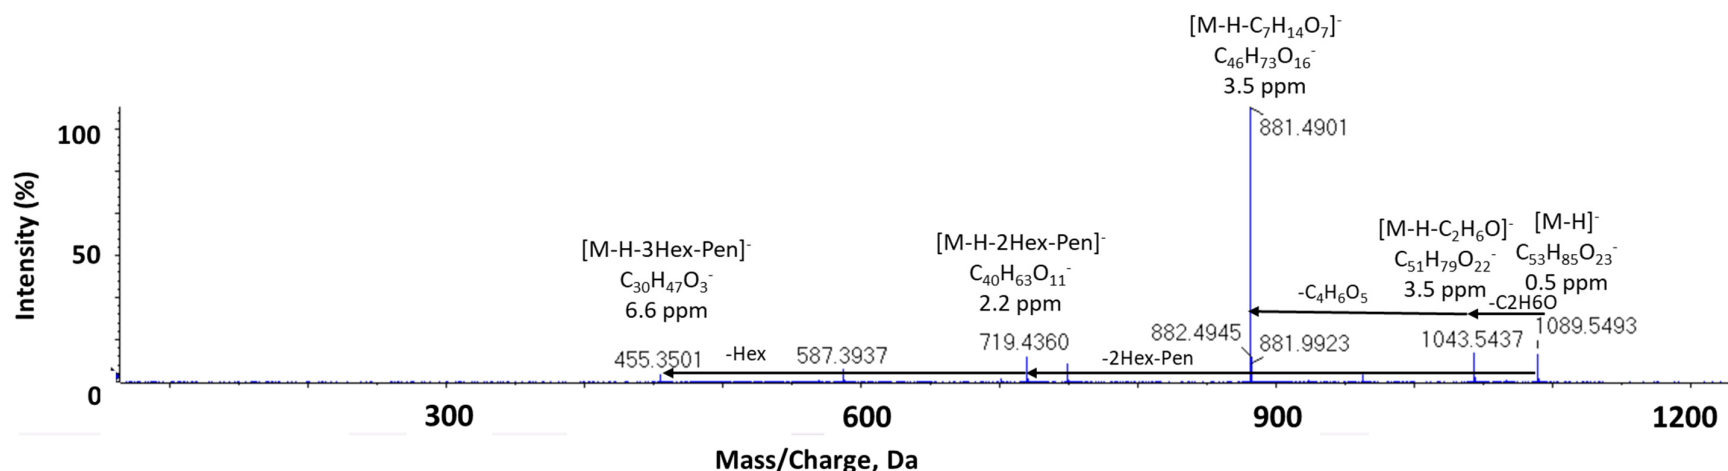

**Figures S10.** Extracted ion chromatogram  $m/z$  1089.5500  $\pm$  0.02 (A), the MS spectra (B) and MS/MS fragmentation patterns (C) of the compounds 11 annotated in the total ethanolic extract of *Aralia elata* var. *mandshurica* (Rupr. & Maxim.) J. Wen roots as araliasaponin III. The analysis relied on RP-UHPLC-QqTOF-MS accomplished with a Waters ACQUITY I-Class UPLC System (Waters GmbH, Eschborn, Germany) coupled on-line to a Triple-TOF6600 hybrid mass spectrometer (Sciex, Darmstadt, Germany) in the negative ion mode. Metabolites were annotated by reversed phase ultra-high performance liquid chromatography-mass spectrometry and tandem mass spectrometry (RP-UHPLC-QqTOF-MS and MS/MS) in targeted data-dependent acquisition (DDA) experiments (with the inclusion list containing the  $m/z$  of all predicted  $[M-H]^-$  ions annotated at the MS1 level).

**A**

XIC from PCA1622\_neg.wiff (sample 1) - Experiment 1, TOF-MS (65-1250): 793.430 +/- 0.025 Da

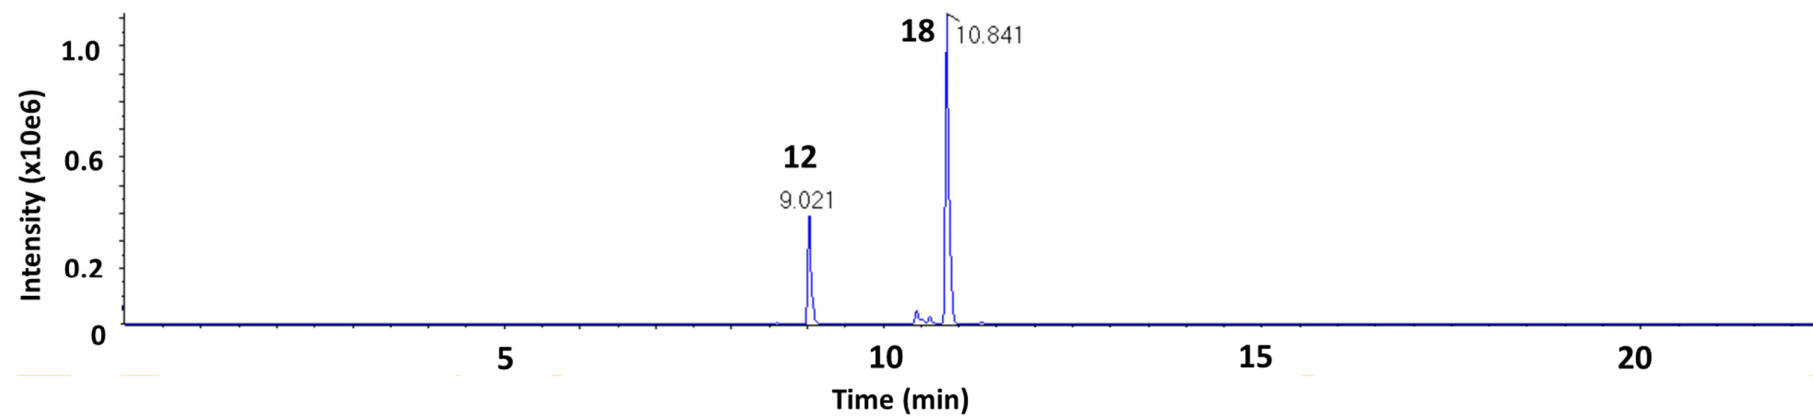



**B**

Spectrum from PCA1622\_neg.wiff (sample 1) – PCA1622\_DDA\_neg, Experiment 1, - TOF MS (65-1250) from 9.021 min

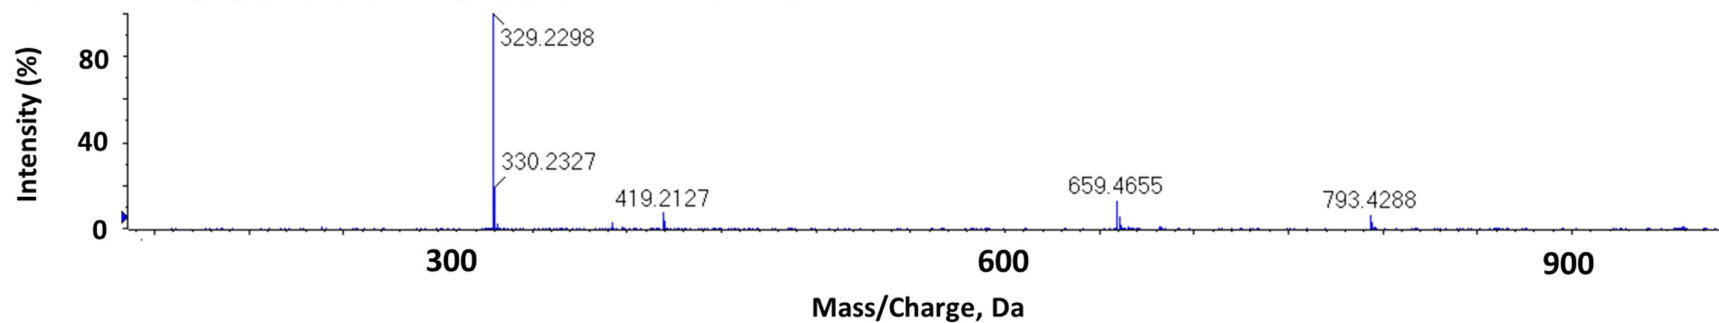

Spectrum from PCA1622\_neg.wiff (sample 1) – PCA1622\_DDA\_neg, Experiment 1, - TOF MS (65-1250) from 10.838 min

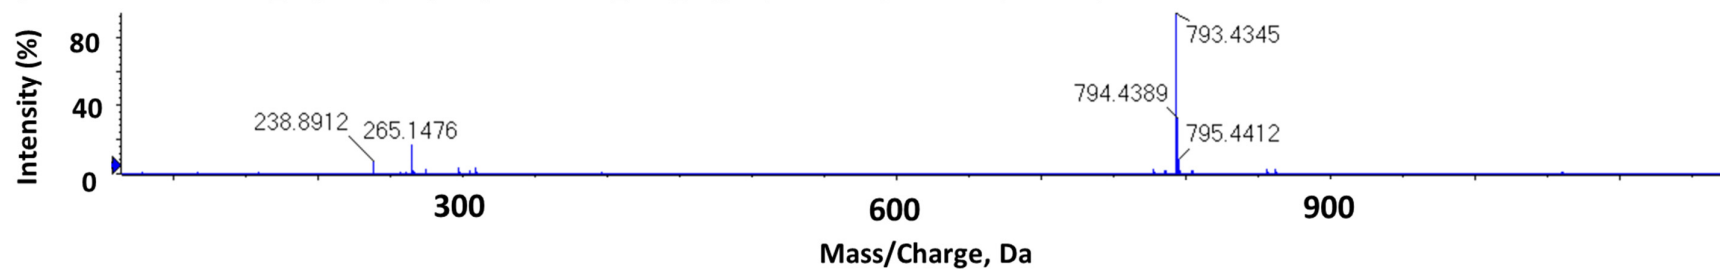

C

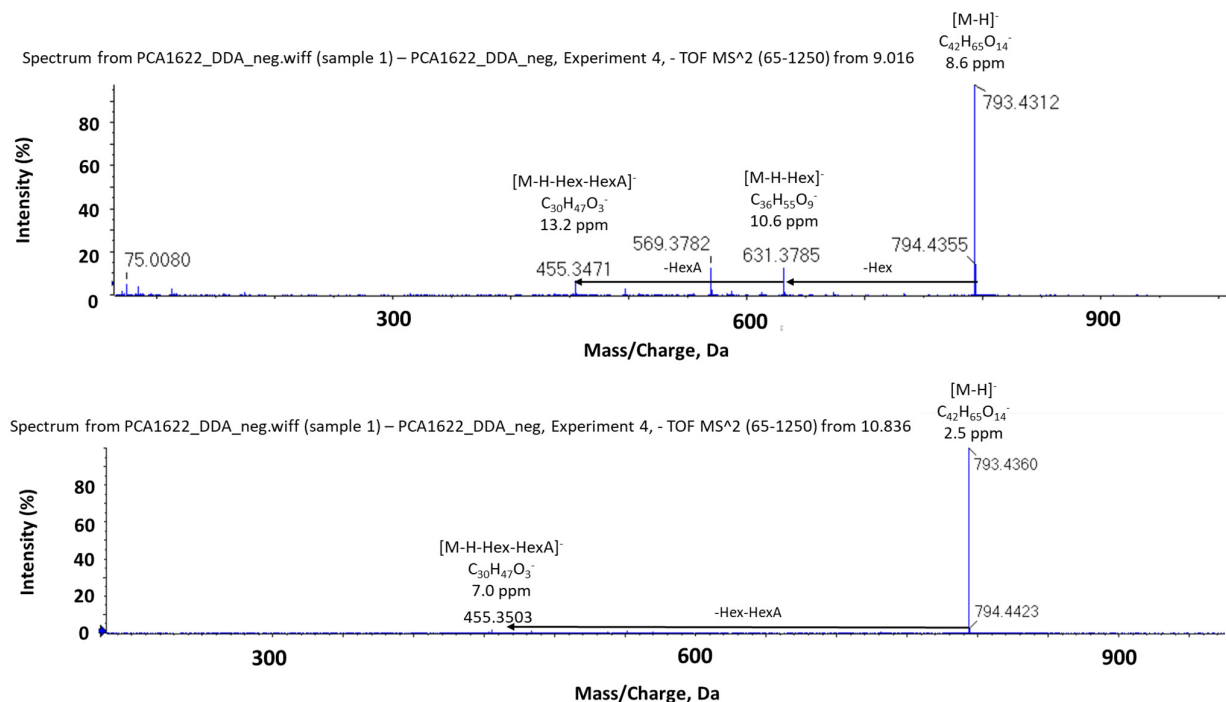

**Figure S11.** Extracted ion chromatogram  $m/z$  793.4400  $\pm$  0.02 (A), the MS spectra (B) and MS/MS fragmentation patterns (C) of the compounds 12, 18 annotated in the total ethanolic extract of *Aralia elata* var. *mandshurica* (Rupr. & Maxim.) J. Wen roots as oleanolic acid-3-*O*-(hexosyl)-28-1-hexouronide ester isomers  $t_R$  9.02 and 10.84, respectively. The analysis relied on RP-UHPLC-QqTOF-MS accomplished with a Waters ACQUITY I-Class UPLC System (Waters GmbH, Eschborn, Germany) coupled on-line to a Triple-TOF6600 hybrid mass spectrometer (Sciex, Darmstadt, Germany) in the negative ion mode. Metabolites were annotated by reversed phase ultra-high performance liquid chromatography-mass spectrometry and tandem mass spectrometry (RP-UHPLC-QqTOF-MS and MS/MS) in targeted data-dependent acquisition (DDA) experiments (with the inclusion list containing the  $m/z$  of all predicted  $[M-H]^-$  ions annotated at the MS1 level).

A

XIC from PCA1622\_neg.wiff (sample 1) - Experiment 1, TOF-MS (65-1250): 925.4700 +/- 0.025 Da

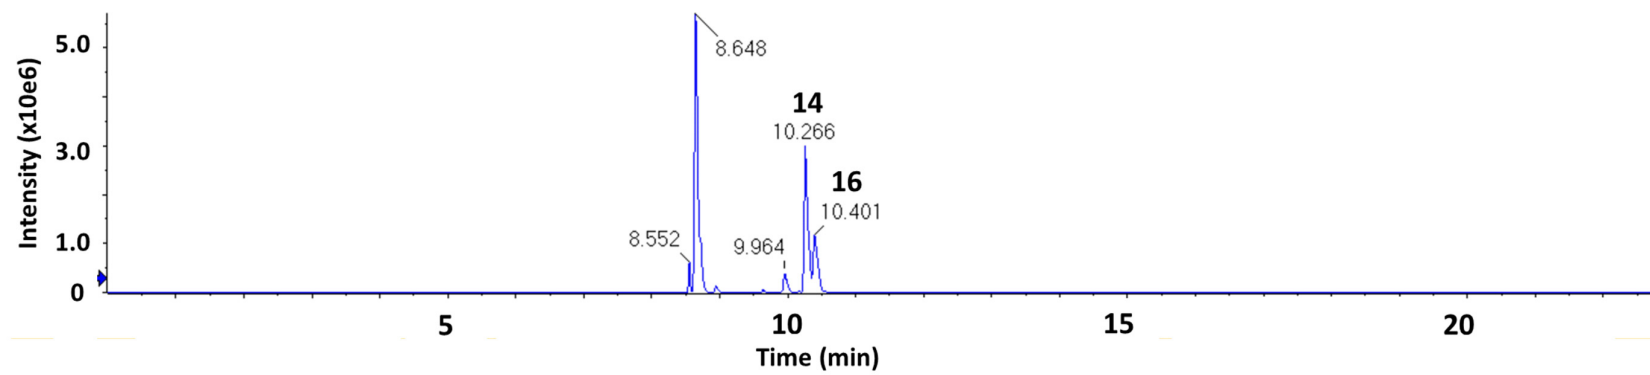

**B**

Spectrum from PCA1622\_neg.wiff (sample 1) – PCA1622\_DDA\_neg, Experiment 1, - TOF MS (65-1250) from 10.266 min

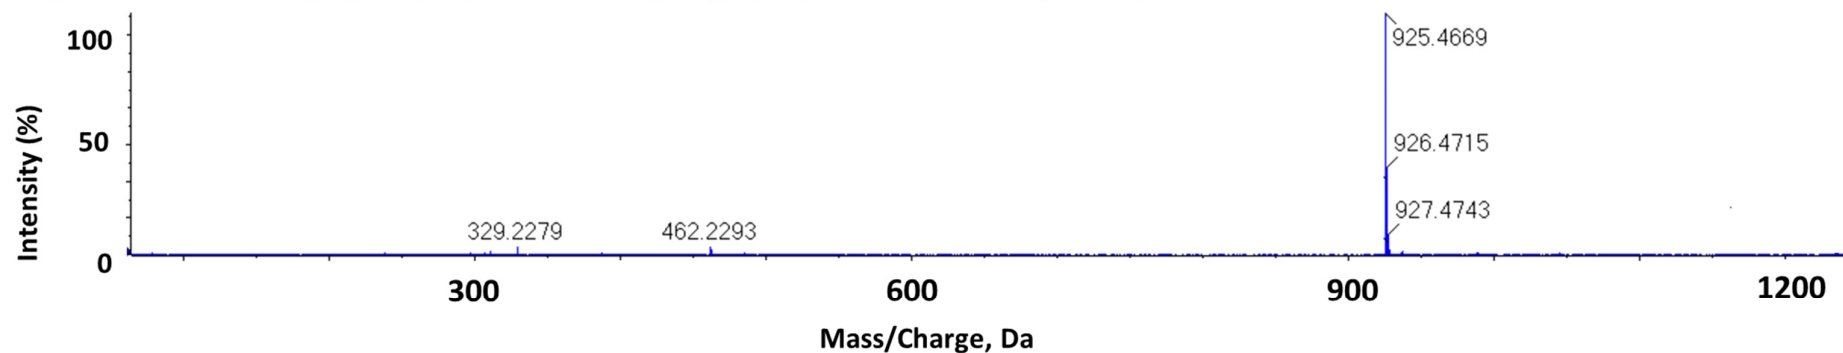

Spectrum from PCA1622\_neg.wiff (sample 1) – PCA1622\_DDA\_neg, Experiment 1, - TOF MS (65-1250) from 10.401 min

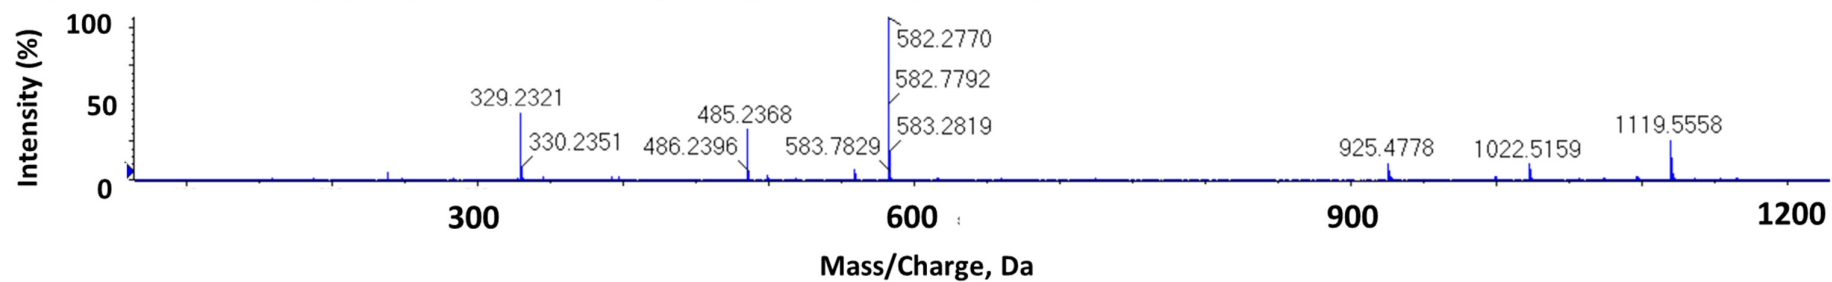

C

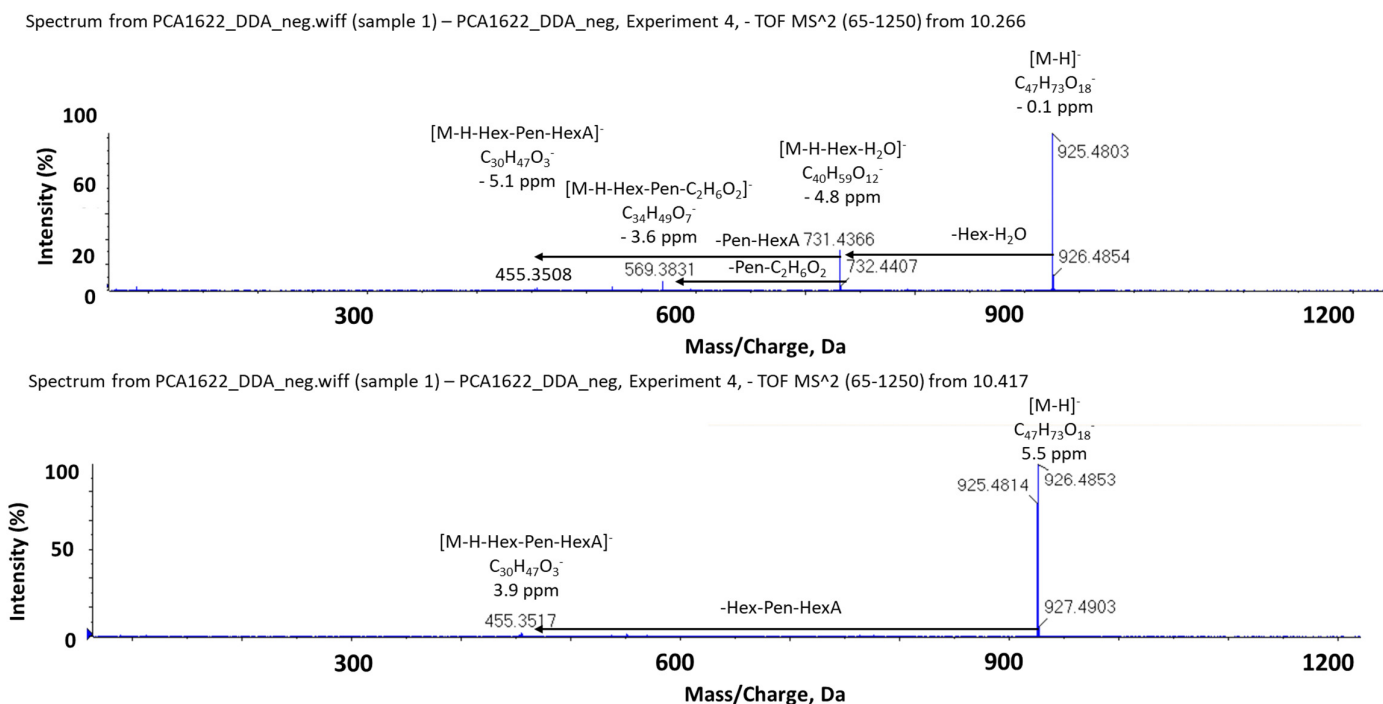

**Figure S12.** Extracted ion chromatogram  $m/z$   $925.4800 \pm 0.02$  (A), the MS spectra (B) and MS/MS fragmentation patterns (C) of the compounds 14, 16 annotated in the total ethanolic extract of *Aralia elata* var. *mandshurica* (Rupr. & Maxim.) J. Wen roots as araloside A isomers  $t_R$  10.266 and 10.401, respectively. The analysis relied on RP-UHPLC-QqTOF-MS accomplished with a Waters ACQUITY I-Class UPLC System (Waters GmbH, Eschborn, Germany) coupled on-line to a Triple-TOF6600 hybrid mass spectrometer (Sciex, Darmstadt, Germany) in the negative ion mode. Metabolites were annotated by reversed phase ultra-high performance liquid chromatography-mass spectrometry and tandem mass spectrometry (RP-UHPLC-QqTOF-MS and MS/MS) in targeted data-dependent acquisition (DDA) experiments (with the inclusion list containing the  $m/z$  of all predicted  $[M-H]^-$  ions annotated at the MS1 level).

A

XIC from PCA1622\_neg.wiff (sample 1) - Experiment 1, TOF-MS (65-1250): 895.460 +/- 0.025 Da

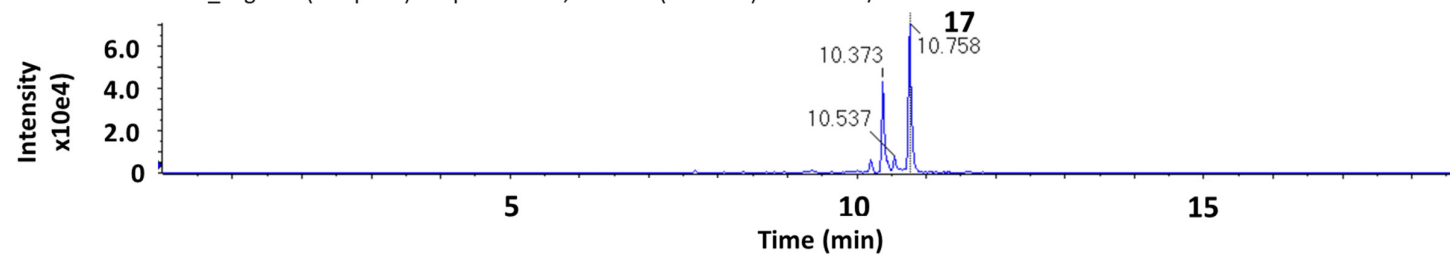

B

Spectrum from PCA1622\_neg.wiff (sample 1) - PCA1622\_DDA\_neg, Experiment 1, - TOF MS (65-1250) from 10.763 min

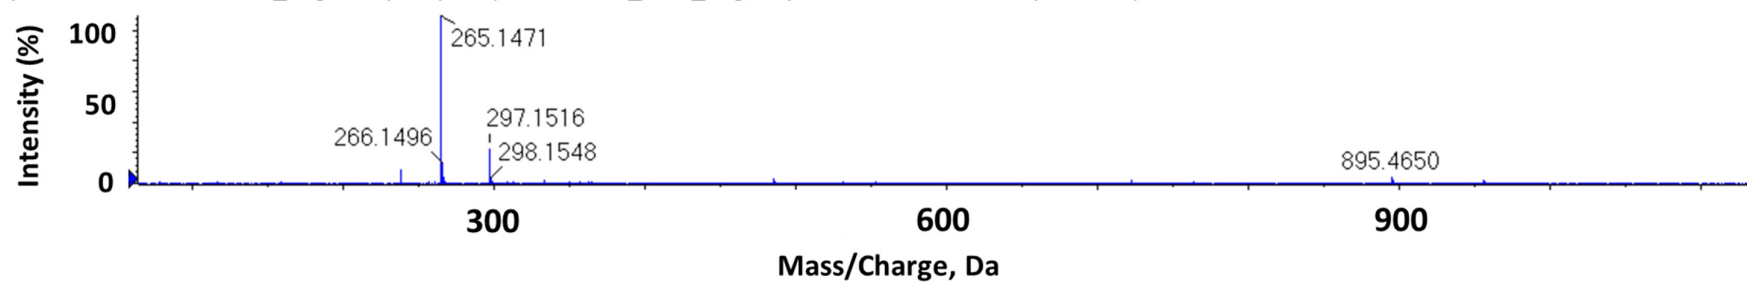

C

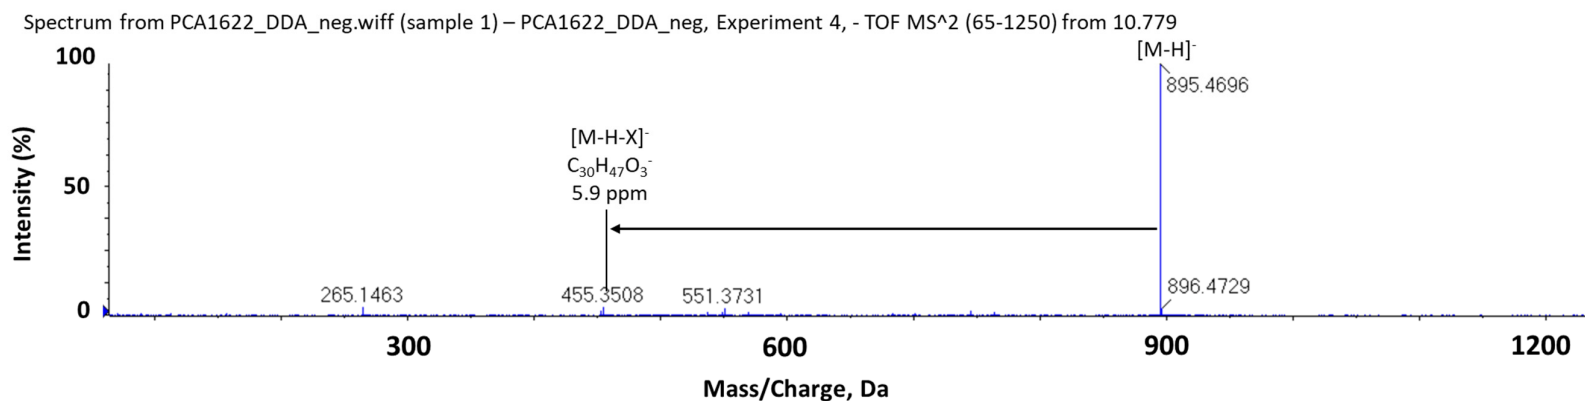

**Figure S13.** Extracted ion chromatogram  $m/z$   $895.4500 \pm 0.02$  (A), the MS spectra (B) and MS/MS fragmentation patterns (C) of the compounds 17 annotated in the total ethanolic extract of *Aralia elata* var. *mandshurica* (Rupr. & Maxim.) J. Wen roots as oleanolic acid unknown derivatives. The analysis relied on RP-UHPLC-QqTOF-MS accomplished with a Waters ACQUITY I-Class UPLC System (Waters GmbH, Eschborn, Germany) coupled on-line to a Triple-TOF6600 hybrid mass spectrometer (Sciex, Darmstadt, Germany) in the negative ion mode. Metabolites were annotated by reversed phase ultra-high performance liquid chromatography-mass spectrometry and tandem mass spectrometry (RP-UHPLC-QqTOF-MS and MS/MS) in targeted data-dependent acquisition (DDA) experiments (with the inclusion list containing the  $m/z$  of all predicted [M-H]<sup>-</sup> ions annotated at the MS1 level).

A

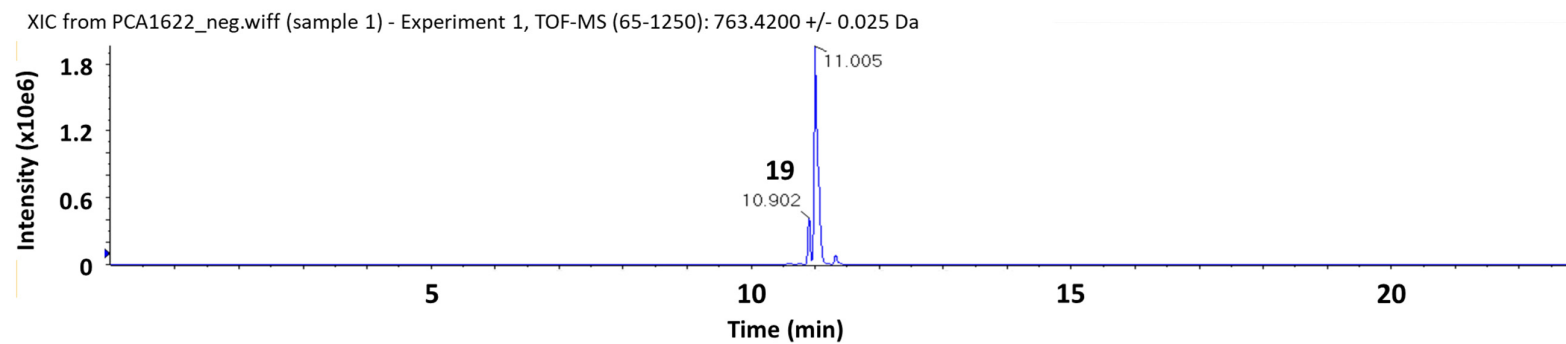

B

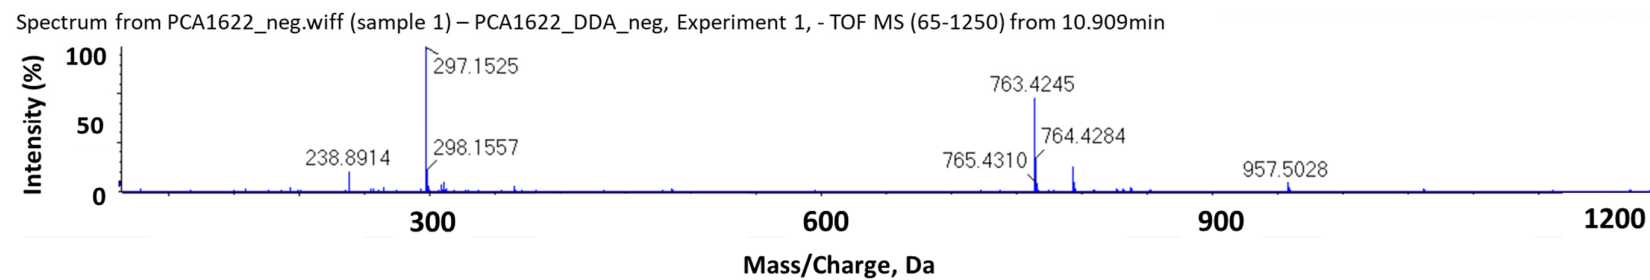



C

Spectrum from PCA1622\_DDA\_neg.wiff (sample 1) – PCA1622\_DDA\_neg, Experiment 4, - TOF MS<sup>2</sup> (65-1250) from 11.059

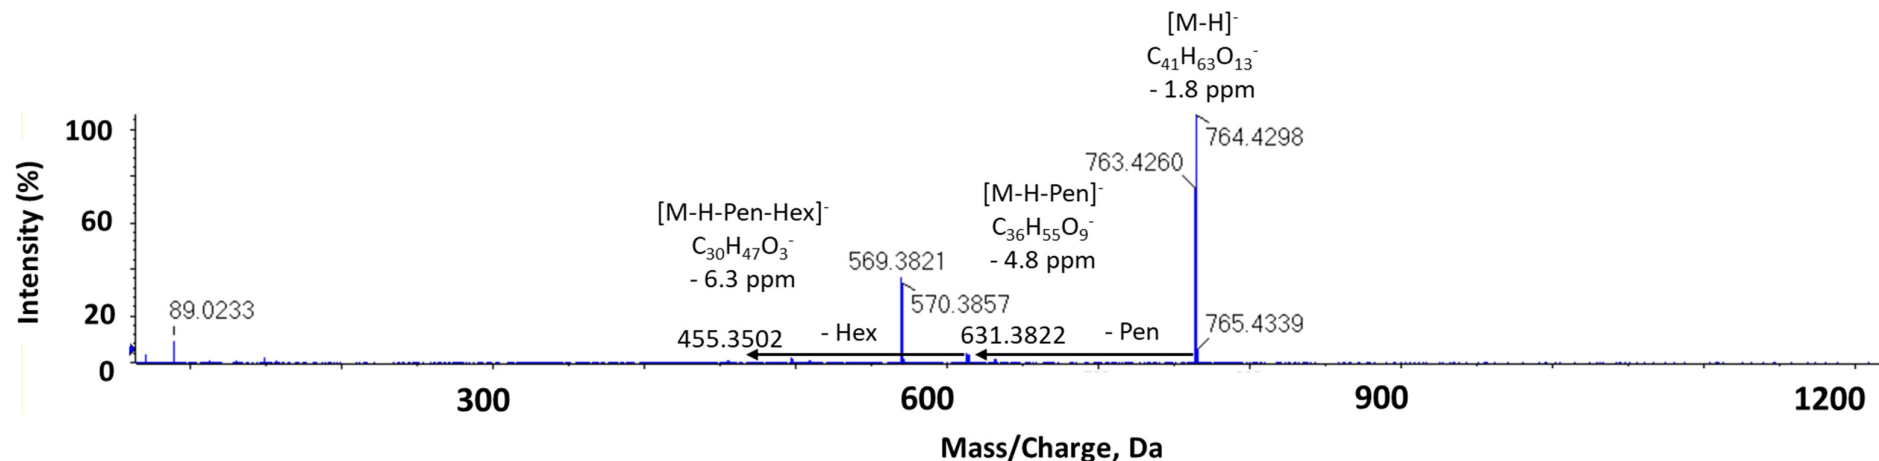

**Figure S14.** Extracted ion chromatogram  $m/z$  763.4300  $\pm$  0.02 (A), the MS spectra (B) and MS/MS fragmentation patterns (C) of the compounds 19 annotated in the total ethanolic extract of *Aralia elata* var. *mandshurica* (Rupr. & Maxim.) J. Wen roots as oleanolic acid 3-*O*-hexuronide-(1-3-pentafuranoside). The analysis relied on RP-UHPLC-QqTOF-MS accomplished with a Waters ACQUITY I-Class UPLC System (Waters GmbH, Eschborn, Germany) coupled on-line to a Triple-TOF6600 hybrid mass spectrometer (Sciex, Darmstadt, Germany) in the negative ion mode. Metabolites were annotated by reversed phase ultra-high performance liquid chromatography-mass spectrometry and tandem mass spectrometry (RP-UHPLC-QqTOF-MS and MS/MS) in targeted data-dependent acquisition (DDA) experiments (with the inclusion list containing the  $m/z$  of all predicted [M-H]<sup>-</sup> ions annotated at the MS1 level).

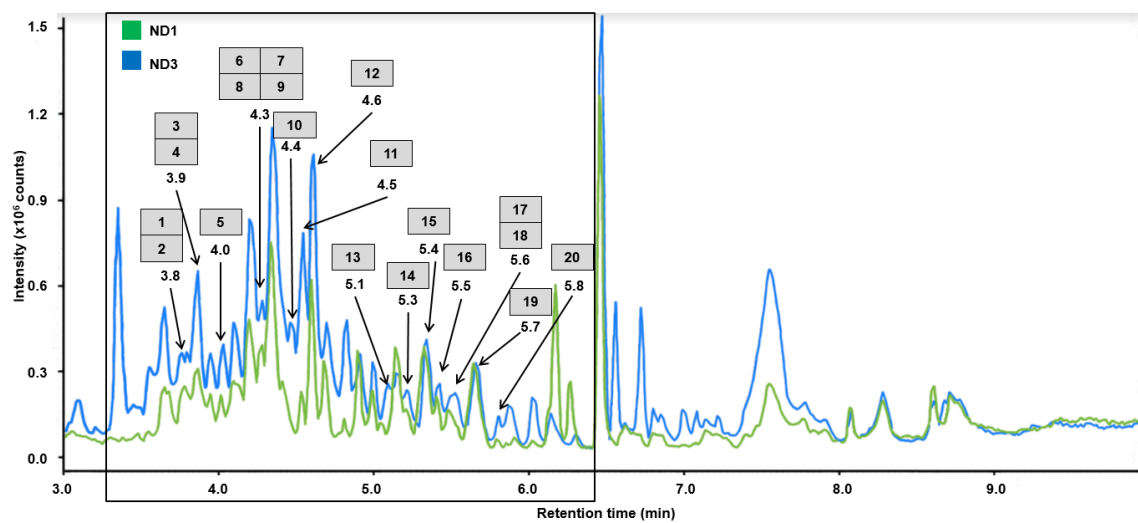

**Figure S15.** The full  $t_R$  range obtained in the chromatograms of ND1 and ND3 extracts of whole roots of *A. elata* (peak numbers correspond to compounds listed in Table 1).

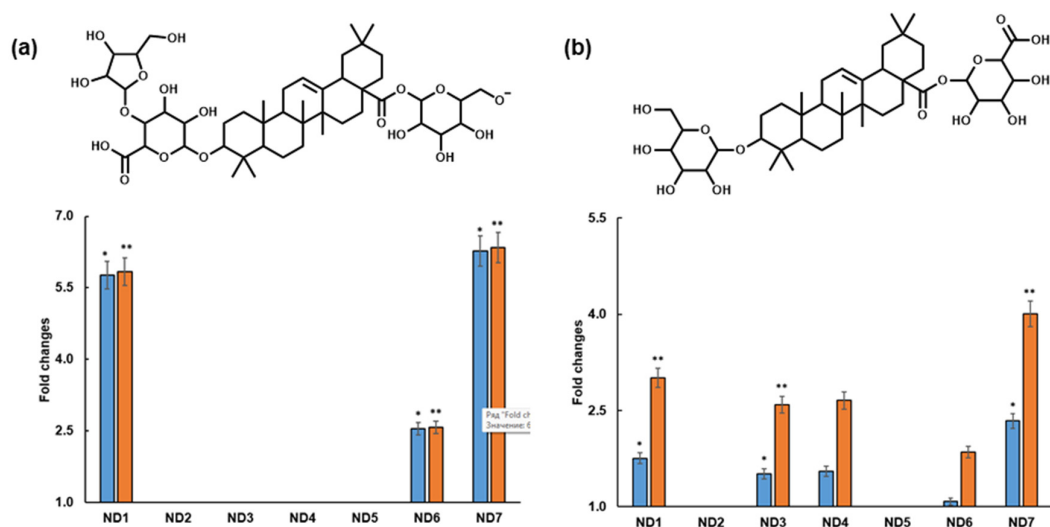

**Figure S16.** Structures and relative recoveries of **14** (araloside isomer 1 (a)), **18** (oleanolic acid-3-*O*-(hexosyl)-28-1-hexouronide ester isomer 1 (b)), **13**, expressed as the difference (fold) in comparison to those observed in aqueous and ethanolic extracts. Fold changes comparison with water (blue), fold changes comparison with ethanol (orange), \* (for recoveries in relation to water) or \*\* (for recoveries in relation to ethanol) -  $p \leq 0.05$  vs. control. The compounds are numbered as in Table 1. ND1 – NADES with choline chloride and malic acid (molar ratio 1:1), ND2 – NADES with the molar ratio of choline chloride and malic acid of 1:2, ND3 – NADES with the molar ratio of choline chloride and lactic acid of 1:3, ND4 - NADES with the molar ratio of choline chloride and lactic acid of 1:3+ 30% (v/v) water, ND6 – NADES with the molar ratio of sorbitol and malic acid of 1:1 + 10% (v/v) water, ND7 - NADES with the molar ratio of sorbitol and malic acid of 1:2+20% (v/v) water.

## References

1. Wang, Q.-H.; Zhang, J.; Ma, X.; Ye, X.-Y.; Yang, B.-Y.; Xia, Y.-G.; Kuang, H.-X. A New Triterpenoid Saponin from the Leaves of *Aralia Elata*. *Chinese Journal of Natural Medicines* 2011, 9 (1), 17–21. [https://doi.org/10.1016/S1875-5364\(11\)60012-5](https://doi.org/10.1016/S1875-5364(11)60012-5).
2. Han, F.; Liang, J.; Yang, B.-Y.; Kuang, H.-X.; Xia, Y.-G. Identification and Comparison of Triterpene Saponins in *Aralia Elata* Leaves and Buds by the Energy-Resolved MS/MS Technique on a Liquid Chromatography/Quadrupole Time-of-Flight Mass Spectrometry. *Journal of Pharmaceutical and Biomedical Analysis* 2021, 203, 114176. <https://doi.org/10.1016/j.jpba.2021.114176>.
3. Jiang, Y. T.; Xu, S. X.; Gu, X. H.; Ren, L.; Chen, Y. J.; Yao, X. S.; Miao, Z. C. Studies on the chemical constituents from *Aralia elata*. *Yao Xue Xue Bao* 1992, 27 (7), 528–532.
4. Xu, Y.; Liu, J.; Zeng, Y.; Jin, S.; Liu, W.; Li, Z.; Qin, X.; Bai, Y. Traditional Uses, Phytochemistry, Pharmacology, Toxicity and Quality Control of Medicinal Genus *Aralia*: A Review. *Journal of Ethnopharmacology* 2022, 284, 114671. <https://doi.org/10.1016/j.jep.2021.114671>.
5. Lin, G.; Yang, J. -s. Studies on the Chemical Constituents of *Aralia Decaisneana* II. *CHINESE PHARMACEUTICAL JOURNAL-BEIJING*- 2004, 39 (8), 575–578.
6. Miyase, T.; Shiokawa, K.-I.; Zhang, D. M.; Ueno, A. Araliasaponins I–XI, Triterpene Saponins from the Roots of *Aralia Decaisneana*. *Phytochemistry* 1996, 41 (5), 1411–1418.
7. Miyase, T.; Sutoh, N.; Zhang, D. M.; Ueno, A. Araliasaponins XII–XVIII, Triterpene Saponins from the Roots of *Aralia Chinensis*. *Phytochemistry* 1996, 42 (4), 1123–1130.
8. Yen, P. H.; Cuc, N. T.; Huong, P. T. T.; Nhiem, N. X.; Hong Chuong, N. T.; Lien, G. T. K.; Huu Tai, B.; Tuyen, N. V.; Van Minh, C.; Van Kiem, P. Araliaarmoside: A New Triterpene Glycoside Isolated from the Leaves of *Aralia Armata*. *Natural Product Communications* 2020, 15 (9), 1934578X20953300.

9. Gao, R.; Liao, M.; Huang, X.; Chen, Y.; Yang, G.; Li, J. Six New Triterpene Derivatives from *Aralia Chinensis* Var. *Dasyphylloides*. *Molecules* 2016, *21* (12), 1700.
10. Song, S.; Nakamura, N.; HATTORI, M.; XU, S. Four New Saponins from the Root Bark of *Aralia Elata*. *Chemical and pharmaceutical bulletin* 2000, *48* (6), 838–842.
11. Kochetkov, N. K.; Khorlin, A. J.; Vaskovsky, V. E. The Structures of Aralosides A and B. *Tetrahedron Letters* 1962, *3* (16), 713–716. [https://doi.org/10.1016/S0040-4039\(00\)70938-5](https://doi.org/10.1016/S0040-4039(00)70938-5).
12. Sun, W. J.; Zhang, D. K.; Sha, Z. F.; Zhang, H. L.; Zhang, X. L. Studies on the Saponins from the Root Bark of *Aralia Chinensis* L. *Yao xue xue bao= Acta Pharmaceutica Sinica* 1991, *26* (3), 197–202.
13. Yu, S.-S.; Yu, D.-Q.; Liang, X.-T. Triterpenoid Saponins from the Roots of *Aralia Spinifolia*. *Journal of natural products* 1994, *57* (7), 978–982.
14. Yen, P. H.; Chuong, N. T. H.; Lien, G. T. K.; Cuc, N. T.; Nhiem, N. X.; Thanh, N. T. V.; Tai, B. H.; Seo, Y.; Namkung, W.; Park, S. Oleanane-Type Triterpene Saponins from *Aralia Armata* Leaves and Their Cytotoxic Activity. *Natural Product Research* 2021, *36* (1), 142–149.
15. Kasprzyk, Z.; Wojciechowski, Z. The Structure of Triterpenic Glycosides from the Flowers of *Calendula Officinalis* L. *Phytochemistry* 1967, *6* (1), 69–75. [https://doi.org/10.1016/0031-9422\(67\)85009-X](https://doi.org/10.1016/0031-9422(67)85009-X).
16. Zaki, A. A.; Qiu, L. Machaerinic Acid 3-O- $\beta$ -D-Glucuronopyranoside from *Calendula Officinalis*. *Natural product research* 2020, *34* (20), 2938–2944.
17. Liang, X. F.; Zhao, Y. Y.; Liu, X. Z.; Yang, X. J.; Fan, Y.; Guo, D. Y.; Song, X. M.; Song, B. Isolation and Identification of Chemical Constituents from *Aralia Taibaiensis* Cortex. *Chin J Exper Trad Med Form* 2018, *20* (24), 56–61.
18. Yoshikawa, M.; Harada, E.; Matsuda, H.; Murakami, T.; Yamahara, J.; Murakami, N. Elatosides A and B, Potent Inhibitors of Ethanol Absorption in Rats from the Bark of *Aralia*

- Elata* SEEM.: The Structure-Activity Relationships of Oleanolic Acid Oligoglycosides. *Chem. Pharm. Bull.* 1993, 41 (11), 2069–2071. <https://doi.org/10.1248/cpb.41.2069>.
19. Song, S.-J.; Nakamura, N.; Ma, C.-M.; Hattori, M.; Xu, S.-X. Five Saponins from the Root Bark of *Aralia Elata*. *Phytochemistry* 2001, 56 (5), 491–497. [https://doi.org/10.1016/S0031-9422\(00\)00379-4](https://doi.org/10.1016/S0031-9422(00)00379-4).
20. Guo, M.; Zhang, L.; Liu, Z. Analysis of Saponins from Leaves of *Aralia Elata* by Liquid Chromatography and Multi-Stage Tandem Mass Spectrometry. *ANAL. SCI.* 2009, 25 (6), 753–755. <https://doi.org/10.2116/analsci.25.753>.
21. Shuyu, C.; Xianggao, L.; Chongxi, Z. Chemical components of *Aralia elata*. *Journal of Jilin Agricultural University (China)* 1992.
22. Ma, Z.; Song, S.; Xu, S. Two new saponins from *Aralia elata* (Miq.) see. *Chinese Journal of Medicinal Chemistry* 2004, 14 (1), 47–48.
23. Zhang, Y.; Peng, Y.; Li, L.; Zhao, L.; Hu, Y.; Hu, C.; Song, S. Studies on Cytotoxic Triterpene Saponins from the Leaves of *Aralia Elata*. *Food Chemistry* 2013, 138 (1), 208–213. <https://doi.org/10.1016/j.foodchem.2012.10.041>.
24. Kuang, H.-X.; Sun, H.; Zhang, N.; Okada, Y.; Okuyama, T. Two New Saponins, Congmuyenosides A and B, from the Leaves of *Aralia Elata* Collected in Heilongjiang, China. *Chem. Pharm. Bull.* 1996, 44 (11), 2183–2185. <https://doi.org/10.1248/cpb.44.2183>.
25. Kim, J. S.; Shim, S. H.; Chae, S.; Han, S. J.; Kang, S. S.; Son, K. H.; Chang, H. W.; Kim, H. P.; Bae, K. Saponins and Other Constituents from the Leaves of *Aralia Elata*. *Chem. Pharm. Bull.* 2005, 53 (6), 696–700. <https://doi.org/10.1248/cpb.53.696>.
26. Xi, F.-M.; Li, C.-T.; Han, J.; Yu, S.-S.; Wu, Z.-J.; Chen, W.-S. Thiophenes, Polyacetylenes and Terpenes from the Aerial Parts of *Eclipta Prostrata*. *Bioorganic & Medicinal Chemistry* 2014, 22 (22), 6515–6522. <https://doi.org/10.1016/j.bmc.2014.06.051>.

27. Matsuo, Y.; Watanabe, K.; Mimaki, Y. Triterpene Glycosides from the Underground Parts of *Caulophyllum Thalictroides*. *J. Nat. Prod.* 2009, 72 (6), 1155–1160. <https://doi.org/10.1021/np900164b>.
28. Nhiem, N. X.; Lim, H. Y.; Kiem, P. V.; Minh, C. V.; Thu, V. K.; Tai, B. H.; Quang, T. H.; Song, S. B.; Kim, Y. H. Oleanane-Type Triterpene Saponins from the Bark of *Aralia Elata* and Their NF-KB Inhibition and PPAR Activation Signal Pathway. *Bioorganic & Medicinal Chemistry Letters* 2011, 21 (20), 6143–6147. <https://doi.org/10.1016/j.bmcl.2011.08.024>.
29. Yoshikawa, M.; Yoshizumi, S.; Ueno, T.; Matsuda, H.; Murakami, T.; Yamahara, J.; Murakami, N. Medicinal Foodstuffs. I. Hypoglycemic Constituents from a Garnish Foodstuff “Taranome,” the Young Shoot of *Aralia Elata* SEEM.: Elatosides G, H, I, J, and K. *Chem. Pharm. Bull.* 1995, 43 (11), 1878–1882. <https://doi.org/10.1248/cpb.43.1878>.
30. Ahmad, V.; Perveen, S.; Bano, S. Guaiacin A and B from the Leaves of *Guaiacum Officinale*. *Planta Med* 1989, 55 (03), 307–308. <https://doi.org/10.1055/s-2006-962014>.
31. Shao, C.-J.; Kasai, R.; Xu, J.-D.; Tanaka, O. Saponins from Roots of *Kalopanax Septemlobus* (THUNB.)KOIDZ., Ciqiu: Structures of *Kalopanax*-Saponins C, D, E and F. *Chem. Pharm. Bull.* 1989, 37 (2), 311–314. <https://doi.org/10.1248/cpb.37.311>.
32. Tian, Y.; Zhang, X.; Liu, H.; Gong, D.; Li, X. Comparison of the Nutritional and Phytochemical Composition and Antioxidant Activities of *Aralia Elata* (Miq.) Seem Fruits in Northeast China. *Arabian Journal of Chemistry* 2021, 14 (12), 103448. <https://doi.org/10.1016/j.arabjc.2021.103448>.
33. Sakai, S.; Katsumata(Nee Ohtsuka), M.; Satoh, Y.; Nagasao, M.; Miyakoshi, M.; Ida, Y.; Shoji, J. Oleanolic Acid Saponins from Root Bark of *Aralia Elata*. *Phytochemistry* 1994, 35 (5), 1319–1324. [https://doi.org/10.1016/S0031-9422\(00\)94846-5](https://doi.org/10.1016/S0031-9422(00)94846-5).
34. Kuljanabhagavad, T.; Thongphasuk, P.; Chamulitrat, W.; Wink, M. Triterpene Saponins from *Chenopodium Quinoa* Willd. *Phytochemistry* 2008, 69 (9), 1919–1926. <https://doi.org/10.1016/j.phytochem.2008.03.001>.

35. Waffo-Téguo, P.; Voutquenne, L.; Thoison, O.; Dumontet, V.; Nguyen, V. H.; Lavaud, C. Acetylated Glucuronide Triterpene Bidesmosidic Saponins from *Symplocos Glomerata*. *Phytochemistry* 2004, 65 (6), 741–750. <https://doi.org/10.1016/j.phytochem.2004.01.012>.
36. Yoshikawa, M.; Murakami, T.; Harada, E.; Murakami, N.; Yamahara, J.; Matsuda, H. Bioactive Saponins and Glycosides. VI. Elatosides A and B, Potent Inhibitors of Ethanol Absorption, from the Bark of *Aralia Elata* SEEM. (Araliaceae): The Structure-Requirement in Oleanolic Acid Glucuronide-Saponins for the Inhibitory Activity. *Chem. Pharm. Bull.* 1996, 44 (10), 1915–1922. <https://doi.org/10.1248/cpb.44.1915>.
37. Tang, H. F.; Yi, Y. H.; Wang, Z. Z.; Jiang, Y. P.; Li, Y. Q. Oleanolic acid saponins from the root bark of *Aralia taibaiensis*. *Yao Xue Xue Bao* 1997, 32 (9), 685–690.
38. Miyase, T.; Kohsaka, H.; Ueno, A. Tragopogonosides A-I, Oleanane Saponins from *Tragopogon Pratensis*. *Phytochemistry* 1992, 31 (6), 2087–2091. [https://doi.org/10.1016/0031-9422\(92\)80368-O](https://doi.org/10.1016/0031-9422(92)80368-O).
